# Supplementary material
Source: PubMed Central journal article supplement (PMC8266673)
Supplement: sbaa199_suppl_suplementary-material.pdf [file sbaa199_suppl_suplementary-material.pdf]

## Supplementary Online Content

### **A systematic review and meta-analysis on the association between specific childhood adversities and symptom dimensions in psychosis.**

Luis Alameda, Angeline Christy\*, Victoria Rodriguez\*, Gonzalo Salazar de Pablo, Giulia Trotta, Carr Ewan, Madeleine Trust, Yi Shen, Beatriz Alameda, Edoardo Spinazzola, Eduardo Iacoponi, Miguel Ruiz Veguilla, Monica Aas, Craig Morgan, Robin Murray.

**Table S1.** PRISMA statement and checklist

**Table S2.** Moose checklist

#### **Search Strategy**

- ***Adversity related items***
- ***Psychosis related items***
- ***Symptom dimensions related items***

**Table S3.** Diagnostic manuals' codes associated with the relevant psychosis diagnoses included

**Table S4.** Inclusion criteria for measures used to operationalise symptom severity

**Table S5.** Summary tables with the direction of the evidence by each dimension

**Figure S1.** PRISMA flow diagram of database search

**Table S6.** Measures used for the symptom dimensions (positive, negative, depressive, disorganized, manic/excited) in people with psychosis

#### **Forest plots**

- **Figure S2.** Forest plot showing relationship between general adversity and positive symptoms
- **Figure S3.** Forest plot showing relationship between sexual abuse (SA) and positive symptoms
- **Figure S4.** Forest plot showing relationship between physical abuse (PA) and positive symptoms
- **Figure S5.** Forest plot showing relationship between emotional abuse (EA) and positive symptoms
- **Figure S6.** Forest plot showing relationship between physical neglect (PN) and positive symptoms
- **Figure S7.** Forest plot showing relationship between emotional neglect (EN) and positive symptoms
- **Figure S8.** Forest plot showing relationship between general adversity and negative symptoms

- **Figure S9.** Forest plot showing relationship between sexual abuse (SA) and negative symptoms
- **Figure S10.** Forest plot showing relationship between physical abuse (PA) and negative symptoms.
- **Figure S11.** Forest plot showing relationship between emotional abuse (EA) and negative symptoms
- **Figure S12.** Forest plot showing relationship between physical neglect (PN) and negative symptoms
- **Figure S13.** Forest plot showing relationship between emotional neglect (EN) and negative symptoms
- **Figure S14.** Forest plot showing relationship between general adversity and depressive symptoms
- **Figure S15.** Forest plot showing relationship between sexual abuse (SA) and depressive symptoms
- **Figure S16.** Forest plot showing relationship between physical abuse (PA) and depressive symptoms
- **Figure S17.** Forest plot showing relationship between emotional abuse (EA) and depressive symptoms
- **Figure S18.** Forest plot showing relationship between physical neglect (PN) and depressive symptoms
- **Figure S19.** Forest plot showing relationship between emotional neglect (EN) and depressive symptoms
- **Figure S20.** Forest plot showing relationship between general adversity and disorganised symptoms
- **Figure S21.** Forest plot showing relationship between sexual abuse (SA) and disorganised symptoms
- **Figure S22.** Forest plot showing relationship between general adversity and mania
- **Figure S23.** Forest plot showing relationship between sexual abuse (SA) and mania
- **Figure S24.** Forest plot showing relationship between physical abuse (PA) and mania
- **Figure S25.** Forest plot showing relationship between emotional abuse (EA) and mania
- **Figure S26.** Forest plot showing relationship between physical neglect (PN) and mania
- **Figure S27.** Forest plot showing relationship between emotional neglect (EN) and mania

**Table S7.** Studies and their respective reasoning for the exclusion of quantitative analyses within symptom dimensions

### 1. Quality Assessment procedures

- **Table S8.** Quality assessment results
- ***Newcastle-Ottawa Quality Assessment Scale for cohort studies***

### 2. Results of heterogeneity assessment

- ***Mania (sexual and physical and emotional abuse analyses)***
- ***Depression (general adversity and all abuse and neglect categories)***

- *Positive (emotional abuse and emotional neglect)*
- *Negative*
- *Disorganization*

### **3. Results of meta-regression analyses**

- *Proportion of females*
- *Mean age*
- *Use of CTQ/PANSS or CTQ or PANSS*
- *Newcastle Ottawa Scale Scores (NOS)*
- **Table S9.** Meta-regressions between general adversity and symptom dimensions and moderating factors

### **4. Sensitivity analysis stratifying analyses**

- **Table S10.** Sensitivity analyses examining impact of measures used on relationships observed

**Table S1.** PRISMA statement and checklist

| Section/topic                      | #  | Checklist item                                                                                                                                                                                                                                                                                              | Page        |
|------------------------------------|----|-------------------------------------------------------------------------------------------------------------------------------------------------------------------------------------------------------------------------------------------------------------------------------------------------------------|-------------|
| <b>TITLE</b>                       |    |                                                                                                                                                                                                                                                                                                             |             |
| Title                              | 1  | Identify the report as a systematic review, meta-analysis, or both.                                                                                                                                                                                                                                         | 1           |
| <b>ABSTRACT</b>                    |    |                                                                                                                                                                                                                                                                                                             |             |
| Structured summary                 | 2  | Provide a structured summary including, as applicable: background; objectives; data sources; study eligibility criteria, participants, and interventions; study appraisal and synthesis methods; results; limitations; conclusions and implications of key findings; systematic review registration number. | 1           |
| <b>INTRODUCTION</b>                |    |                                                                                                                                                                                                                                                                                                             |             |
| Rationale                          | 3  | Describe the rationale for the review in the context of what is already known.                                                                                                                                                                                                                              | 2,3         |
| Objectives                         | 4  | Provide an explicit statement of questions being addressed with reference to participants, interventions, comparisons, outcomes, and study design (PICOS).                                                                                                                                                  | 3           |
| <b>METHODS</b>                     |    |                                                                                                                                                                                                                                                                                                             |             |
| Protocol and registration          | 5  | Indicate if a review protocol exists, if and where it can be accessed (e.g., Web address), and, if available, provide registration information including registration number.                                                                                                                               | 4           |
| Eligibility criteria               | 6  | Specify study characteristics (e.g., PICOS, length of follow-up) and report characteristics (e.g., years considered, language, publication status) used as criteria for eligibility, giving rationale.                                                                                                      | 4-5         |
| Information sources                | 7  | Describe all information sources (e.g., databases with dates of coverage, contact with study authors to identify additional studies) in the search and date last searched.                                                                                                                                  | 4           |
| Search                             | 8  | Present full electronic search strategy for at least one database, including any limits used, such that it could be repeated.                                                                                                                                                                               | 6, SM 23-26 |
| Study selection                    | 9  | State the process for selecting studies (i.e., screening, eligibility, included in systematic review, and, if applicable, included in the meta-analysis).                                                                                                                                                   | 4,7         |
| Data collection process            | 10 | Describe method of data extraction from reports (e.g., piloted forms, independently, in duplicate) and any processes for obtaining and confirming data from investigators.                                                                                                                                  | 6           |
| Data items                         | 11 | List and define all variables for which data were sought (e.g., PICOS, funding sources) and any assumptions and simplifications made.                                                                                                                                                                       | 6           |
| Risk of bias in individual studies | 12 | Describe methods used for assessing risk of bias of individual studies (including specification of whether this was done at the study or outcome level), and how this information is to be used in any data synthesis.                                                                                      | 6, SM 26    |
| Summary measures                   | 13 | State the principal summary measures                                                                                                                                                                                                                                                                        | 6,7         |
| Risk of bias across studies        | 15 | Specify any assessment of risk of bias (i.e. Newcastle-Ottawa Scale (NOS), that may affect the cumulative evidence.                                                                                                                                                                                         | 7, 8        |
| Additional analyses                | 16 | Describe methods of additional analyses (e.g., sensitivity or subgroup analyses, meta-regression), if done, indicating which were pre-specified.                                                                                                                                                            | 8           |
| <b>RESULTS</b>                     |    |                                                                                                                                                                                                                                                                                                             |             |

|                               |    |                                                                                                                                                                                      |                       |
|-------------------------------|----|--------------------------------------------------------------------------------------------------------------------------------------------------------------------------------------|-----------------------|
| Study selection               | 17 | Give numbers of studies screened, assessed for eligibility, and included in the review, with reasons for exclusions at each stage, ideally with a flow diagram.                      | 8,9, SM 20            |
| Study characteristics         | 18 | For each study, present characteristics for which data were extracted (e.g., study size, PICOS, follow-up period) and provide the citations.                                         | SM 5-15               |
| Risk of bias within studies   | 19 | Present data on risk of bias of each study and, if available, any outcome level assessment.                                                                                          | 13, SM 24-26          |
| Results of individual studies | 20 | For all outcomes considered (benefits or harms), present, for each study a summary data for each intervention group.                                                                 | SM; 5-15              |
| Synthesis of results          | 21 | Present results of study analysed.                                                                                                                                                   | 10-13, SM; 17, 18     |
| Risk of bias across studies   | 22 | Present results of any assessment of risk of bias across studies                                                                                                                     | 13, SM; 17,18, 42, 43 |
| Additional analysis           | 23 | Give results of additional analyses, if done (e.g., sensitivity or subgroup analyses, meta-regression)                                                                               | 13, 14, SM 43-56      |
| <b>DISCUSSION</b>             |    |                                                                                                                                                                                      |                       |
| Summary of evidence           | 24 | Summarize the main findings including the strength of evidence for each main outcome; consider their relevance to key groups (e.g., healthcare providers, users, and policy makers). | 15-20                 |
| Limitations                   | 25 | Discuss limitations at study and outcome level (e.g., risk of bias), and at review-level (e.g., incomplete retrieval of identified research, reporting bias).                        | 15,16                 |
| Conclusions                   | 26 | Provide a general interpretation of the results in the context of other evidence, and implications for future research.                                                              | 20                    |
| <b>FUNDING</b>                |    |                                                                                                                                                                                      |                       |
| Funding                       | 27 | Describe sources of funding for the systematic review and other support; role of funders for the systematic review.                                                                  | N/A                   |

**Table S2.** Moose checklist

| Criteria                                           |                                                                                                            | Brief description of how the criteria were handled in the meta-analysis                                                                                                                                                                                                                                        |
|----------------------------------------------------|------------------------------------------------------------------------------------------------------------|----------------------------------------------------------------------------------------------------------------------------------------------------------------------------------------------------------------------------------------------------------------------------------------------------------------|
| <b>Reporting of background should include</b>      |                                                                                                            |                                                                                                                                                                                                                                                                                                                |
| √                                                  | Problem definition                                                                                         | No meta-analysis has been conducted to examine the association between childhood adversities and the five relevant symptom dimensions within psychosis together                                                                                                                                                |
| √                                                  | Hypothesis statement                                                                                       | We hypothesized that exposure to experiences of childhood adversities may exacerbate the various symptom dimensions within psychosis patients.                                                                                                                                                                 |
| √                                                  | Description of study outcomes                                                                              | The severity of the following symptom dimensions; positive, negative, depressive, disorganised and manic symptoms.                                                                                                                                                                                             |
| √                                                  | Type of exposure or intervention used                                                                      | Exposure to overall childhood adversity and/or its subtypes; sexual, physical and emotional abuse and; emotional and physical neglect.                                                                                                                                                                         |
| √                                                  | Type of study designs used                                                                                 | Both cross sectional and longitudinal studies were included. Design detailed in the methods section.                                                                                                                                                                                                           |
| √                                                  | Study population                                                                                           | Psychotic patients with the following diagnoses: schizophrenia, schizophreniform/brief psychotic episode, bipolar disorder with psychotic features, schizoaffective disorder, major depression with psychotic features, psychosis not otherwise specified.                                                     |
| <b>Reporting of search strategy should include</b> |                                                                                                            |                                                                                                                                                                                                                                                                                                                |
| √                                                  | Qualifications of searchers                                                                                | The credentials of the investigators are indicated in the author list.                                                                                                                                                                                                                                         |
| √                                                  | Search strategy, including time period included in the synthesis and keywords                              | A literature search was conducted up to May 2019. We searched Medical Subjects Headings (MeSH) and keywords related to: (1) psychosis; (2) childhood adversity (3) clinical dimensions, using the Boolean operator 'AND' (full list of search terms provided in Online Supplementary Material – Search Terms). |
| √                                                  | Databases and registries searched                                                                          | Three OVID databases; MEDLINE, EMBASE and PsycINFO, and on Cochrane Libraries.                                                                                                                                                                                                                                 |
| √                                                  | Use of hand searching                                                                                      | Included studies of relevant systematic reviews/ meta-analyses and the references from the included studies were manually screened and searched.                                                                                                                                                               |
| √                                                  | List of citations located and those excluded, including justifications                                     | Details of the literature search process are outlined in the results section and PRISMA flowchart.                                                                                                                                                                                                             |
| √                                                  | Method of addressing articles published in languages other than English                                    | Only articles in the English language were selected.                                                                                                                                                                                                                                                           |
| √                                                  | Method of handling abstracts and unpublished studies                                                       | Only original individual studies that were fully accessible were included in our study.                                                                                                                                                                                                                        |
| √                                                  | Description of any contact with authors                                                                    | Authors were contacted in the case of missing data or for further information, through email. If no response was given, there was one further attempt at contact.                                                                                                                                              |
| <b>Reporting of methods should include</b>         |                                                                                                            |                                                                                                                                                                                                                                                                                                                |
| √                                                  | Description of relevance or appropriateness of studies assembled for assessing the hypothesis to be tested | Detailed inclusion and exclusion criteria are described in the methods section.                                                                                                                                                                                                                                |
| √                                                  | Rationale for the selection and coding of data                                                             | Data extracted from each of the studies are relevant to the population characteristics, study design and study outcomes.                                                                                                                                                                                       |
| √                                                  | Assessment of confounding                                                                                  | We did not investigate confounding factors                                                                                                                                                                                                                                                                     |

|                                                |                                                                                                      |                                                                                                                                                                                                                                                                        |
|------------------------------------------------|------------------------------------------------------------------------------------------------------|------------------------------------------------------------------------------------------------------------------------------------------------------------------------------------------------------------------------------------------------------------------------|
| √                                              | Assessment of study quality and stratification or regression on possible predictors of study results | We evaluated the quality of the included studies using the Newcastle-Ottawa Scale. Meta-regression and sensitivity analyses were also performed to assess the influence of potential covariates; female participants, mean age, use of PANSS/CTQ and NOS quality score |
| √                                              | Assessment of heterogeneity                                                                          | Heterogeneity was assessed with the I <sup>2</sup> index.                                                                                                                                                                                                              |
| √                                              | Description of statistical methods in sufficient detail to be replicated                             | A random-effects meta-analysis was used. Heterogeneity among study point estimates was assessed using Q statistics. The proportion of the total variability in the effect size estimates was evaluated with the I <sup>2</sup> index.                                  |
| √                                              | Provision of appropriate tables and graphics                                                         | Figures are included to reflect the literature search process and forest plots of the meta-analyses conducted. Tables are also provided to depict additional data of all analyses conducted and to present relevant key information                                    |
| <b>Reporting of results should include</b>     |                                                                                                      |                                                                                                                                                                                                                                                                        |
| √                                              | Table summarizing individual study estimates and overall estimate                                    | We reported this in the results and supplementary section.                                                                                                                                                                                                             |
| √                                              | Table giving descriptive information for each study included                                         | We have presented descriptive information for each study in the tables within the supplementary material.                                                                                                                                                              |
| √                                              | Results of sensitivity testing                                                                       | Subgroup analyses were conducted as specified in the manuscript.                                                                                                                                                                                                       |
| √                                              | Indication of statistical uncertainty of findings                                                    | We discuss in our limitations some potential bias that should be taken into account when interpreting our findings.                                                                                                                                                    |
| <b>Reporting of discussion should include</b>  |                                                                                                      |                                                                                                                                                                                                                                                                        |
| √                                              | Quantitative assessment of bias                                                                      | Our discussion discusses potential bias that have been taken into account                                                                                                                                                                                              |
| √                                              | Justification for exclusion                                                                          | We excluded studies based on the rationale of other meta-analysis and our own judgement and this is documented in the methods section, supported with tables in SM and discussed in the main manuscript.                                                               |
| √                                              | Assessment of quality of included studies                                                            | The quality of the studies was assessed and reported using the Newcastle Ottawa Scale (NOS)                                                                                                                                                                            |
| <b>Reporting of conclusions should include</b> |                                                                                                      |                                                                                                                                                                                                                                                                        |
| √                                              | Consideration of alternative explanations for observed results                                       | We have addressed this point in the discussion section.                                                                                                                                                                                                                |
| √                                              | Generalization of the conclusions                                                                    | We have addressed this point in the discussion section.                                                                                                                                                                                                                |
| √                                              | Guidelines for future research                                                                       | We have addressed this point in the discussion section.                                                                                                                                                                                                                |
| √                                              | Disclosure of funding source                                                                         | We have addressed this point at the end of the discussion section                                                                                                                                                                                                      |

## Search Strategy

### **Adversity related items**

- Embase
  - Mesh Terms
    19. *Sexual Abuse*
    20. *Physical Abuse*
    21. *Emotional abuse*
    22. *Neglect*
    23. *Child Abuse*
    24. *Bullying*
    25. *Sexual Bullying*
    26. *Rape*
    27. *Domestic Violence*
    28. *Psychotrauma*
    29. *Early life stress*
    30. *Sexual harassment*
- Medline
  - Mesh Terms
    1. *Sex Offenses*
    2. *Physical Abuse*
    3. *Child Abuse*
    4. *Bullying*
    16. *Rape*
    17. *Domestic Violence*
    18. *Sexual Harassment*
- PsychInfo
  - Mesh Terms
    5. *Sexual Abuse*
    6. *Physical Abuse*
    7. *Emotional Abuse*
    8. *Child Abuse*
    9. *Child Neglect*
    10. *Emotional Trauma*
    11. *Bullying*
    12. *Abandonment*
    13. *Rape*
    14. *Domestic Violence*
    15. *Sexual Harassment*
- Key Words
  31. *(separat\* adj5 parent\*)*
  32. *victimi\**
  33. *(advers\* adj5 experienc\*)*
  34. *adversit\**
  35. *emotional abuse*
  36. *psychological abuse*
  37. *neglect*
  38. *bully\**
  39. *bullied\**
  40. *parental loss*
  41. *(Childhood adj5 trauma)*



42. *(abandon adj10 parent\*)*
43. *early life events*
44. *maltreat\**
45. *(parent adj5 loss)*
46. *(Childhood adj5 maltreat\*)*
47. *early adversity*
48. *being taken into care*
49. *early life stress*
50. *communication deviance*
51. *household discord*
52. *rape*
53. *domestic violence*
54. *sexual harassment*
55. *psychotrauma*
56. *emotional trauma*
57. *sexual abuse*
58. *physical abuse*

### ***Psychosis related items***

- Embase
  - Mesh Terms
    59. *psychosis*
    60. *schizophrenia*
    61. *schizoaffective psychosis*
- Medline
  - Mesh Terms
    62. *Psychotic Disorders*
    63. *Schizophrenia*
- PsychoInfo
  - Mesh Terms
    64. *Psychosis*
    65. *Acute Psychosis*
    66. *Affective Psychosis*
    67. *Schizophrenia*
    68. *Schizoaffective Disorder*
- Key Words
  69. *psychos\**
  70. *psychot\**
  71. *schizophr\**
  72. *schizoaf\**

### ***Symptom dimensions related items***

- Embase
  - Mesh Terms
  - Positive syndrome
  - Negative syndrome
  - Mania
  - Delusions
  - Hallucinations
- Medline
  - Mesh Terms

- Delusions
- Hallucinations
- **PsychInfo**
  - Mesh Terms
  - Positive and negative symptoms
  - Psychiatric symptoms
  - Mania
  - Anxiety
  - Major depression
  - Psychopathology
  - Delusions
  - Hallucinations
- **Key Words**
  73. Symptom severity
  74. Hallucinat\*
  75. Delusion\*
  76. Depressive symptom\*
  77. Positive symptom\*
  78. Negative symptom\*
  79. Disorganized symptom\*
  80. Manic symptom\*
  81. Positive dimension\*
  82. Negative dimension\*
  83. Anxious dimension\*
  84. Disorganized dimension\*
  85. Depressive dimension\*
  86. Excited dimension\*
  87. Clinical dimension\*
  88. Symptom domain
  89. Manic dimension
  90. (anxiety adj3 symptom)
  91. (disorga\* adj3 dimension)
  92. (disorga\* adj3 symptom)
  93. (depress\* adj3 dimension)
  94. (depress\* adj3 symptom)
  95. (mani\* adj3 symptom)
  96. (mani\* adj3 dimension)

**Table S3.** Diagnostic manuals' ICD10 and DSM-IV codes of the diagnostic categories included

| <b>Diagnosis</b>                                         | <b>Code used within ICD-10</b> | <b>Code used within DSM-IV</b>             |
|----------------------------------------------------------|--------------------------------|--------------------------------------------|
| <b>Schizophrenia</b>                                     | F20                            | 295.10/295.20/<br>295.30/295.60/<br>295.90 |
| <b>Brief psychotic disorder</b>                          | F23                            | -                                          |
| <b>Schizophreniform disorder</b>                         | F20.81                         | Schizophreniform disorder                  |
| <b>Bipolar disorder with psychotic features</b>          | F31.2                          | 296.04/296.44/<br>296.54/296.64            |
| <b>Schizoaffective disorder</b>                          | F25.0                          | 295.70                                     |
| <b>Major depressive disorder with psychotic features</b> | F33.3                          | 296.24/296.34                              |
| <b>Psychosis, not otherwise specified</b>                | F29                            | 298.9                                      |

**Table S4.** Inclusion criteria for outcomes measures used to symptom dimensions severity

The instruments below were chosen for being the most common instruments used to assess symptoms in individuals with psychosis and were chosen by authors after careful examination of relevant reviews in the field<sup>1-3</sup> and based on their previous experience in clinical practise. If during the full text screening, a new instrument not included in the initially considered, it was discussed in a group meeting whether it should be included or not. Only validated instruments were considered, which means that they went through a validation study process, where the usual parameters of quality were examined (inter-rater reliability, concurrent validity etc...).

|                     |                                                                                                                                                                                                                     |
|---------------------|---------------------------------------------------------------------------------------------------------------------------------------------------------------------------------------------------------------------|
| <b>Positive</b>     | <ul style="list-style-type: none"> <li>● PANSS</li> <li>● SAPS</li> <li>● BPRS</li> <li>● DIP</li> <li>● CAPE</li> </ul>                                                                                            |
| <b>Negative</b>     | <ul style="list-style-type: none"> <li>● PANSS</li> <li>● SANS</li> <li>● BPRS</li> <li>● DIP</li> <li>● CAPE</li> </ul>                                                                                            |
| <b>Depressed</b>    | <ul style="list-style-type: none"> <li>● PANSS</li> <li>● BDI-II</li> <li>● BPRS</li> <li>● CDSS</li> <li>● MADRS</li> <li>● PHQ-9</li> <li>● CAPE</li> <li>● CESD-R</li> <li>● DI-PAD</li> <li>● DASS21</li> </ul> |
| <b>Disorganised</b> | <ul style="list-style-type: none"> <li>● PANSS</li> <li>● BPRS</li> </ul>                                                                                                                                           |
| <b>Manic</b>        | <ul style="list-style-type: none"> <li>● PANSS</li> <li>● BPRS</li> <li>● YMRS</li> <li>● DI-PAD</li> </ul>                                                                                                         |

*Note.* PANSS= Positive and Negative Syndrome Scale; SAPS= Scales for the Assessment of Positive Symptoms; BPRS= Brief Psychiatric Rating Scale; DIP=Diagnostic Interview for Psychosis; CAPE= The Community Assessment of Psychic Experience; SANS=Scale for the Assessment of Negative Symptoms; BDI-II= Beck Depression Inventory- II; CDSS= Calgary Depression Scale for Schizophrenia; MADRS= The Montgomery–Åsberg Depression Rating Scale; PHQ-9= The Patient Health Questionnaire-9; CESD-R= Center for Epidemiologic Studies Depression Scale- Revised; DI-PAD= Diagnostic Interview for Psychosis and Affective Disorders; DASS21= The Depression, Anxiety and Stress Scale - 21 Items; YMRS= Young Mania Rating Scale.



**Table S5.** Characteristics in papers included in the systematic review

| Author<br>Year<br>Country                | Sample<br>Mean Age<br>% female<br>Education (y) | Design                | Measures of<br>childhood<br>adversity                        | Psychosis<br>measure | Analysis                             | Covariates<br>(yes / no)                                                                                                                                                                                                    | Dimensions                                                                                                                                                                                          | Main findings<br>Dimension<br>Significant<br>findings                                                                                                                                                                                                                                                                                                              | Quality<br>check<br>score |
|------------------------------------------|-------------------------------------------------|-----------------------|--------------------------------------------------------------|----------------------|--------------------------------------|-----------------------------------------------------------------------------------------------------------------------------------------------------------------------------------------------------------------------------|-----------------------------------------------------------------------------------------------------------------------------------------------------------------------------------------------------|--------------------------------------------------------------------------------------------------------------------------------------------------------------------------------------------------------------------------------------------------------------------------------------------------------------------------------------------------------------------|---------------------------|
| Aas<br>2016 <sup>4</sup><br>Norway       | 96 FEP<br>27.4(18-65)<br>44%                    | Prospective<br>1 year | CTQ<br><br>Composite and<br>subscale (EA, PA,<br>SA, EN, PN) | DSM-IV               | The<br>Spearman'<br>s<br>correlation | No                                                                                                                                                                                                                          | (1) Positive<br>(PANSS)<br><br>(2) Negative<br>(PANSS)<br><br>(3) Excited<br>(PANSS)<br><br>(4)<br>Disorganized/<br>concrete<br>(PANSS)<br><br>(5) Depressive<br>(PANSS)<br><br>(6) Manic<br>(YMRS) | (1) Positive<br>Positive<br>significant: PA,<br>EN<br><br>(2) Negative<br>Positive<br>significant: PN<br><br>(3) Disorganized<br>Positive<br>significant: PA,<br>PN, EN,<br>composite CA<br><br>(4) Excited<br>Positive<br>significant: SA,<br>PA, EA, EN,<br>composite CA<br><br>(5) Depressed<br>Positive<br>significant: PA,<br>SA, EA, PN, EN,<br>composite CA | 4                         |
| Ajnakina<br>2016 <sup>5</sup><br>England | 236 FEP<br>28.7 (18-65)<br>35.2%                | Cross<br>sectional    | CECA,Q<br><br>Subscale - PA, SA.                             | ICD-10               | Linear<br>Regression<br>Analysis     | Yes; age at<br>first<br>contact,<br>gender,<br>ethnicity,<br>lifetime<br>use of<br>alcohol,<br>cannabis<br>or other<br>illegal<br>substance<br>use prior<br>to<br>psychosis<br>onset,<br>family<br>history of<br>psychosis. | (1) Positive<br>(PANSS)<br><br>(2) Negative<br>(PANSS)<br><br>(3) Excited<br>(PANSS)<br><br>(4) Depressed<br>(PANSS)<br><br>(5)<br>Disorganized<br>(PANSS)                                          | (1) Positive<br>Positive<br>significant: PA,<br>SA.<br><br>(2) Negative:<br>N.S.<br><br>(3) Excited<br>Positive<br>significant: PA,<br>SA<br><br>(4) Depressed:<br>N.S.<br><br>(5) Disorganized<br>Positive<br>significant: PA                                                                                                                                     | 6                         |

|                                          |                                               |                                                           |                                                                                                                                           |                    |                                                                                                                            |                                                  |                                                                                                                                                           |                                                                                                                                                                                                                                                                                             |   |
|------------------------------------------|-----------------------------------------------|-----------------------------------------------------------|-------------------------------------------------------------------------------------------------------------------------------------------|--------------------|----------------------------------------------------------------------------------------------------------------------------|--------------------------------------------------|-----------------------------------------------------------------------------------------------------------------------------------------------------------|---------------------------------------------------------------------------------------------------------------------------------------------------------------------------------------------------------------------------------------------------------------------------------------------|---|
| Alameda 2016 <sup>6</sup><br>Switzerland | 196 early psychosis<br>24.06 (18-35)<br>29.1% | Prospective:<br>2, 6, 12, 18,<br>24, 30 and<br>36 months. | Extensive<br>Assessment and<br>Clinical<br>Interviews<br><br>Composite (Early<br>and late CA) and<br>subscales (SA, PA,<br>EA, PN and EN) | DSM-IV             | 2-level<br>regression<br>model<br>Random<br>intercept<br>models<br>and<br>random<br>intercept<br>and slope<br>alternatives | Yes; age,<br>sex, SES<br>status and<br>SES level | (1) Positive<br>(PANSS)<br><br>(2) Negative<br>(PANSS)<br><br>(3) Depressive<br>(MADRS)<br><br>(4) Manic<br>(YMRS)                                        | (1) Positive<br>Positive<br>significant: Early<br>composite CA<br><br>(2) Negative<br>Positive<br>significant: Early<br>and late<br>composite CA<br><br>(3) Depressive<br>Positive<br>significant: Early<br>composite CA<br><br>(4) Manic<br>Positive<br>significant: Early<br>composite CA | 7 |
| Alameda 2017 <sup>7</sup><br>Switzerland | 209 early psychosis<br>24.67 (18-35)<br>34%   | Prospective:<br>2, 6, 12, 18,<br>24, 30 and<br>36 months. | Interview, family<br>and patients<br>records<br><br>Composite (Early<br>≤ 12 and late = 12<br>- 16 years old)                             | DSM-IV<br>criteria | Mediation<br>analyses                                                                                                      | No                                               | (1) Depressive<br>(MADRS)                                                                                                                                 | (1) Depressive<br>Positive<br>significant: Early<br>CA (2, 6, 24, 30<br>and 36 months)                                                                                                                                                                                                      | 6 |
| Alameda 2018 <sup>8</sup><br>Switzerland | 133 early psychosis<br>25.19 (18-35)<br>43.2% | Cross-<br>Sectional                                       | Extensive<br>Assessment of<br>exposure to<br>traumatic life<br>events<br><br>Composite                                                    | DSM-IV             | One way<br>ANOVA                                                                                                           | Yes; age,<br>sex,                                | (1) Positive<br>(PANSS)<br><br>(2) Negative<br>(PANSS)<br><br>(3) Depressive<br>(PANSS)<br><br>(4) Manic<br>(PANSS)<br><br>(5)<br>Disorganized<br>(PANSS) | (1) Positive: N.S.<br><br>(2) Negative:<br>N.S.<br><br>(3) Depressive<br>Positive<br>significant:<br>Composite CA<br><br>(4) Manic: N.S.<br><br>(5) Disorganized<br>Positive<br>significant:<br>Composite CA                                                                                | 5 |
| Baudin 2016 <sup>9</sup><br>France       | 366 schizophrenia<br>32 (15-84)<br>25.14%     | Cross-<br>Sectional                                       | CTQ<br><br>Composite                                                                                                                      | DSM-IV-<br>TR      | Multiple<br>Regression<br>Analyses                                                                                         | Yes; Age,<br>gender                              | (1) Positive<br>(PANSS)<br><br>(2) Negative<br>(PANSS)<br><br>(3)<br>Disorganized<br>(PANSS)<br><br>(4)<br>Excitement<br>(PANSS)                          | (1) Positive<br>Positive<br>significant:<br>Composite CA<br><br>(2) Negative:<br>N.S.<br><br>(3) Disorganized<br>Positive<br>significant:<br>Composite CA<br><br>(4) Excitement<br>Positive<br>significant:<br>Composite CA                                                                 | 7 |
| Bendall 2011 <sup>10</sup>               | 40 patients<br>with FEP                       | Cross-<br>Sectional                                       | CTQ                                                                                                                                       | DSM                | Correlation<br>analysis                                                                                                    | No                                               | (1) Positive<br>(PANSS)                                                                                                                                   | (1) Positive<br>N.S.                                                                                                                                                                                                                                                                        | 5 |

|                                         |                                                                |                 |                                                               |           |                              |                                                                             |                                                                                |                                                                                                                                                      |   |
|-----------------------------------------|----------------------------------------------------------------|-----------------|---------------------------------------------------------------|-----------|------------------------------|-----------------------------------------------------------------------------|--------------------------------------------------------------------------------|------------------------------------------------------------------------------------------------------------------------------------------------------|---|
| Australia                               | 21 (15-29)<br>50%                                              |                 | Composite                                                     |           |                              |                                                                             | (2) Negative (PANSS)<br><br>(3) Depression (CESD-R)                            | (2) Negative N.S.<br><br>(3) Depression Positive significant: Composite CA                                                                           |   |
| Bendall 2013 <sup>11</sup><br>Australia | 28 FEP<br>21(15-29)<br>47%                                     | Cross-sectional | CTQ<br><br>Composite                                          | DSM-IV    | Mann-Whitney's U-test        | No                                                                          | (1) Positive (PANSS)<br><br>(2) Negative (PANSS)                               | (1) Positive Positive significant: Composite CA<br><br>(2) Negative Positive significant: N.S.                                                       | 4 |
| Bi 2018 <sup>12</sup><br>China          | 201 schizophrenia<br>32.58 (18 - 65)<br>75.6%                  | Cross-Sectional | CTQ-SF<br><br>Composite and subscales (EA, PA, SA, EN and PN) | ICD-10    | Spearman Correlation         | No                                                                          | (1) Positive (PANSS)<br><br>(2) Negative (PANSS)<br><br>(3) Excitement (PANSS) | <i>No significant associations observed in any analyses</i>                                                                                          | 5 |
| Chae 2015 <sup>13</sup><br>South Korea  | 98 schizophrenia<br>43(18-65)<br>49%                           | Cross-Sectional | CTQ-SF<br><br>Composite and subscales (EA, PA, SA, EN and PN) | DSM-IV-TR | Partial correlation analysis | Yes; age, sex                                                               | (1) Positive (PANSS)<br><br>(2) Negative (PANSS)<br><br>(3) Depression (BDI)   | (1) Positive Positive significant: SA and composite CA<br><br>(2) Negative: N.S.<br><br>(3) Depression Positive significant: EA, EN and composite CA | 5 |
| Collip 2013 <sup>14</sup><br>Belgium    | 195 patients with a psychotic disorder<br>28.1(15-60)<br>26.7% | Cross-sectional | CTQ<br><br>Composite                                          | DSM-IV    | Multilevel regression        | Yes; Age, gender and depressive symptoms                                    | (1) Positive (BPRS)                                                            | (1) Positive Positive significant: Composite CA                                                                                                      | 6 |
| Comacchio 2018 <sup>15</sup><br>Europe  | 444 FEP<br>30.2 (18-54)<br>41.4%                               | Cross-Sectional | CECA-Q<br><br>Subscales (PA and SA)                           | ICD-10    | Analysis of Variance         | Yes; education level, marital status, employment, nationality and diagnosis | (1) Positive (PANSS)<br><br>(2) Negative (PANSS)                               | (1) Positive: N.S.<br><br>(2) Negative Positive significant: PA, SA                                                                                  | 5 |
| Derosse 2014 <sup>16</sup><br>USA       | 184 patients with schizophrenia and schizophrenia              | Cross-sectional | CTQ<br><br>Subscale (EA, PA, SA, EN, PN)                      | DSM-IV    | Regression ANCOVA            | No                                                                          | (1) Positive (CAPE)<br><br>(2) Negative (CAPE)                                 | (1) Positive Positive significant: EA, PA, SA<br><br>(2) Negative                                                                                    | 5 |



|                                                |                                                             |                     |                                                                                |        |                                  |                  |                                                                                                                                                                               |                                                                                                                                                                                 |   |
|------------------------------------------------|-------------------------------------------------------------|---------------------|--------------------------------------------------------------------------------|--------|----------------------------------|------------------|-------------------------------------------------------------------------------------------------------------------------------------------------------------------------------|---------------------------------------------------------------------------------------------------------------------------------------------------------------------------------|---|
|                                                | affective disorder<br>40.98<br>30.97%                       |                     |                                                                                |        |                                  |                  | (3) Depression (CAPE)                                                                                                                                                         | Positive significant: EA<br><br>(3) Depression Positive significant: EA, SA                                                                                                     |   |
| Duhig 2015 <sup>17</sup><br>Australia          | 100 patients with a psychotic illness<br>21.4(17-26)<br>38% | Cross-sectional     | CTQ<br><br>Composite and subscale (EA, PA, SA, EN, PN)                         | ICD-10 | Spearman's correlation           | NO               | (1) Positive (PANSS)<br><br>(2) Negative (PANSS)<br><br>(3) Depression (DASS21)                                                                                               | (1) Positive Positive significant: PN and composite CA<br><br>(2) Negative Positive significant: PN<br><br>(3) Depression Positive significant: EA, PA, SA, PN and composite CA | 5 |
| Gabinio 2018 <sup>18</sup><br>USA              | 20 with schizophrenia<br>41.3<br>45%                        | Cross-sectional     | ETISR-SF<br><br>Composite and subscale (SA)                                    | DSM-5  | The spearman correlation         | No               | (1) Depression (Diagnostic Interview for Psychosis and Affective Disorder 6 - DI-PAD)<br><br>(2) Mania (Diagnostic Interview for Psychosis and Affective Disorder 6 - DI-PAD) | <i>No significant associations observed in any analyses</i>                                                                                                                     | 4 |
| Green 2014 <sup>19</sup><br>Australia          | 429 with Schizophrenia<br>39.31 (20-65)<br>34.3%<br>13.46   | Cross-Sectional     | CAQ<br><br>Subscales (PA, EA, EN)                                              | ICD-10 | Hierarchical Regression Analysis | Yes; gene (COMT) | (1) Positive (DIP)<br><br>(2) Negative (DIP)                                                                                                                                  | (1) Positive Positive significant: PA<br><br>(2) Negative Positive significant: EN                                                                                              | 5 |
| Haahr 2018 <sup>20</sup><br>Norway and Denmark | 191 FEP<br>27.9 (18-65; 15-65 in one site)<br>40%<br>12.1   | Prospective 5 years | BBTS<br><br>Composite*<br><br><i>*Specifically, close interpersonal trauma</i> | DSM-IV | t-test                           | No               | (1) Positive (PANSS)<br><br>(2) Negative (PANSS)<br><br>(3) Depressive (PANSS)<br><br>(4) Excitative (PANSS)                                                                  | <i>No significant associations were observed within findings of analyses</i>                                                                                                    | 5 |

|                                             |                                                                           |                                                  |                                                              |                                                           |                                         |                                                                 |                                                                                     |                                                                                                                  |   |
|---------------------------------------------|---------------------------------------------------------------------------|--------------------------------------------------|--------------------------------------------------------------|-----------------------------------------------------------|-----------------------------------------|-----------------------------------------------------------------|-------------------------------------------------------------------------------------|------------------------------------------------------------------------------------------------------------------|---|
| Hardy 2016 <sup>21</sup><br>United Kingdom  | 228 patients with relapsing psychosis<br>38.24(18-65)<br>27.63%           | Prospective<br>Baseline, 3, 6, 12, and 24-months | THQ<br><br>Subscales (SA, PA and EA)                         | DSM-IV                                                    | Linear regression                       | YES; age, gender and ethnicity                                  | (1) Depression (BDI)                                                                | <i>No significant associations were observed within findings of analyses</i>                                     | 6 |
| Heins 2011 <sup>22</sup><br>Netherlands     | 268 patients with nonaffective psychotic disorder<br>28.1(16-55)<br>30.5% | Cross-sectional                                  | CTQ<br><br>Composite                                         | DSM-IV                                                    | Multilevel logistic regression          | Yes<br>Age and sex                                              | (1) Positive (PANSS)<br><br>(2) Negative (PANSS)                                    | (1) Positive Positive significant: Composite CA<br><br>(2) Negative: N.S.                                        | 6 |
| Kilcommons 2005 <sup>23</sup><br>UK         | -32 with a schizophrenia spectrum disorder<br>-34.5 (18-60)<br>-21.875%   | Cross-sectional                                  | THQ<br><br>Composite                                         | DSM-IV                                                    | Pearson's correlation                   | No                                                              | (1) Positive (PANSS)                                                                | <i>No significant associations were observed within findings of analyses</i>                                     | 4 |
| Kumari 2013 <sup>24</sup><br>UK             | 28 with schizophrenia<br>35.4<br>0%                                       | Cross-sectional                                  | Psychosocial deprivation assessment (PSD)<br><br>Composite   | Structure d Clinical Interview for DSM IV Axis I disorder | ANOVA                                   | YES;<br>History of serious violence                             | (1) Positive (PANSS)<br><br>(2) Negative (PANSS)                                    | <i>No significant associations were observed within findings of analyses</i>                                     | 4 |
| Lindgren 2017 <sup>25</sup><br>Finland      | 75 FEP<br>26.4 (18-40)<br>34.7%                                           | Cross-Sectional                                  | Baseline interview of childhood adversities<br><br>Composite | DSM-IV                                                    | Spearman Correlation                    | None used for analyses of interest                              | (1) Positive (BPRS)<br><br>(2) Negative (BPRS)<br><br>(3) Depression (BDI)          | <i>No significant associations were observed within findings of analyses</i>                                     | 4 |
| Lysaker 2001 <sup>26</sup><br>United States | 43 with schizophrenia or schizoaffective disorder<br>45<br>0%             | Cross sectional                                  | Self-report questionnaire<br><br>Subscale (SA)               | DSM-IV (SCID)                                             | ANOVA                                   | No                                                              | (1) Positive (PANSS)<br><br>(2) Negative (PANSS)<br><br>(3) Disorganisation (PANSS) | (1) Positive Positive significant: SA<br><br>(2) Negative: N.S.<br><br>(3) Disorganised Positive significant: SA | 4 |
| Lysaker 2005 <sup>27</sup><br>USA           | 43 with schizophrenia or schizoaffective disorder<br>46<br>0%<br>12       | Prospective (biweekly assessments for 16 weeks)  | CEQ<br><br>Subscale (SA)                                     | DSM-IV                                                    | Repeated Measures ANOVA                 | No                                                              | (1) Positive (PANSS)                                                                | (1) Positive Positive significant: SA                                                                            | 4 |
| McCabe 2012 <sup>28</sup><br>Australia      | 408 with schizophrenia<br>40.72 (18-65)<br>34.3%<br>13.41                 | Cross-Sectional                                  | CAQ<br><br>Composite & subscale (SA)                         | ICD-10                                                    | Logistic and linear regression analyses | Yes;<br>gender, age, education, family history of schizophrenia | (1) Positive (DIP)<br><br>(2) Negative (SANS)                                       | (1) Positive Positive significant: Composite CA, SA.<br><br>(2) Negative: N.S.                                   | 6 |

|                                               |                                                                    |                                                   |                                                                    |           |                                                                                                            |                                                                                                                                                  |                                                                                                     |                                                                                                                                                                                                                                      |   |
|-----------------------------------------------|--------------------------------------------------------------------|---------------------------------------------------|--------------------------------------------------------------------|-----------|------------------------------------------------------------------------------------------------------------|--------------------------------------------------------------------------------------------------------------------------------------------------|-----------------------------------------------------------------------------------------------------|--------------------------------------------------------------------------------------------------------------------------------------------------------------------------------------------------------------------------------------|---|
| Mohammad zadeh <sup>29</sup><br>2019<br>Iran  | 82 patients with schizophrenia<br>34.78 (18-59)<br>58.5%<br>9.85   | Cross-sectional                                   | CTQ-SF<br><br>Composite and subscales (EA PA, SA, EN & PN).        | DSM-IV-TR | <i>t-test</i>                                                                                              | No                                                                                                                                               | (1) Positive (PANSS)<br><br>(2) Negative (PANSS)<br><br>(3) Depression (BDI-II)                     | (1) Positive<br>Positive significant: SA, PA, EA, PN, EN, Composite CA<br><br>(2) Negative<br>Positive significant: SA, PA, EA, PN, Composite CA<br><br>(3) Depression<br>Positive significant: SA, PA, EA, PN, EN, Composite CA     | 4 |
| Offen<br>2002 <sup>30</sup><br>United Kingdom | 26 patients with psychotic disorder<br>34(23-67)<br>34.6%          | Cross-sectional                                   | Questioning regarding history of sexual abuse<br><br>Subscale (SA) | N/A       | -Whitney test                                                                                              | No                                                                                                                                               | (1) Depression (BDI)                                                                                | (1) Depression<br>Positive significant: SA                                                                                                                                                                                           | 4 |
| Okubo<br>2017 <sup>31</sup><br>Japan          | 255 outpatients with schizophrenia<br>43.2(20-65)<br>44.7%<br>12.6 | Cross-sectional                                   | CATS<br><br>Composite and subscale (EN, SA).                       | DSM-V     | Correlation analyses<br><br>Stepwise multiple linear regression                                            | Yes: age, employment status, symptom remission, antipsychotic dosage, and CGI-S; positive, negative, and disorganized symptom scores on the BPRS | (1) Depression (PHQ-9)                                                                              | (1) Depression<br>Positive significant: SA, EN, composite CA                                                                                                                                                                         | 5 |
| Pruessner<br>2019 <sup>32</sup><br>Canada     | 210 FEP<br>23.73 (14-35)<br>31.4%                                  | Prospective<br><br>Baseline, 12 months, 24 months | CTQ<br><br>Composite and subscale (EN, PN, PA, SA, EA)             | DSM-IV    | Spearman Correlation<br><br>Multiple linear regression analyses<br><br>Stepwise multiple linear regression | Yes - substance abuse and dependence                                                                                                             | (1) Positive (BPRS)<br><br>(2) Negative (BPRS)<br><br>(3) Manic (BPRS)<br><br>(4) Depressive (BPRS) | (1) Positive<br>Positive significant; EA<br><br>(2) Negative<br>Positive significant: Composite CA, EN.<br>Negative significant: EA<br><br>(3) Manic<br>Positive significant: N.S.<br><br>(4) Depressive<br>Positive significant: EA | 6 |

|                                          |                                                                     |                                                        |                                                         |                                                       |                                                            |              |                                                                                                        |                                                                                                                           |   |
|------------------------------------------|---------------------------------------------------------------------|--------------------------------------------------------|---------------------------------------------------------|-------------------------------------------------------|------------------------------------------------------------|--------------|--------------------------------------------------------------------------------------------------------|---------------------------------------------------------------------------------------------------------------------------|---|
| Rajkumar 2015 <sup>33</sup><br>India     | 62 Schizophrenia<br>35.3 (19-54)<br>50%                             | Cross sectional                                        | CTQ<br><br>Composite and subscales (PA, EA, SA, PN, EN) | DSM-IV                                                | Pearson's Spearman rho                                     | Yes (gender) | (1) Positive (PANSS)<br><br>(2) Negative (PANSS)<br><br>(3) Depression (CDSS)                          | (1) Positive: N.S.<br><br>(2) Negative: N.S.<br><br>(3) Depression Positive significant: SA, EA, EN, composite CA         | 4 |
| Ramsay 2011 <sup>34</sup><br>USA         | 61 nonaffective psychosis<br>23.6 (18-37)<br>27.9%<br>11.7          | Cross-Sectional                                        | CTQ-SF -<br>Composite and Subscale (PA, EA, SA, RN, PN) | DSM-IV                                                | Spearman Correlation                                       | No           | (1) Positive (SAPS)<br><br>(2) Negative (SANS)                                                         | (1) Positive Positive significant: EA<br><br>(2) Negative Positive significant: EN                                        | 4 |
| Ruby 2017 <sup>35</sup><br>United States | 28 schizophrenia patients<br>31.5 (range = N/A, SD = 9.7)<br>28.57% | Cross-sectional                                        | ETI<br><br>Composite                                    | Diagnostic interview for genetic studies (DIGS)       | Pearson's correlation<br><br>Multiple regression model     | No           | (1) Positive (PANSS)<br><br>(2) Negative (PANSS)                                                       | (1) Positive Positive significant: CA<br><br>(2) Negative Negative significant: CA                                        | 5 |
| Sahin 2013 <sup>36</sup><br>Turkey       | 83 First episode schizophrenia<br>23.1 (N/A)<br>27.71%              | Cross sectional                                        | CTQ<br><br>Composite and subscale (PA, EA, SA, EN, PN)  | DSM-IV (SCID)                                         | Mann-Whitney U test                                        | No           | (1) Positive (SAPS)                                                                                    | (1) Positive Positive significant : SA, EN, Composite CA                                                                  | 4 |
| Sar 2010 <sup>37</sup><br>Turkey         | 70 psychosis<br>38.3 (19-59)<br>54.3%<br>10.1                       | Cross-Sectional                                        | CTQ<br><br>Composite and subscale (PN, PA)              | DSM-IV                                                | Pearson Correlation                                        | No           | (1) Positive (SAPS)<br><br>(2) Negative (SANS)                                                         | (1) Positive: N.S.<br><br>(2) Negative: N.S.                                                                              | 4 |
| Sayin 2013 <sup>38</sup><br>Turkey       | 100 patients with schizophrenia<br>36.48 (18-65)<br>47%             | Cross-sectional                                        | CTQ<br><br>Composite and subscale (EA)                  | Semistructured clinical interview for DSM-IV (SCID-I) | Multivariate Linear Regression Analysis<br><br>Correlation | No           | (1) Positive (SAPS)<br><br>(2) Negative (SANS)<br><br>(3) Depression (CDSS)                            | (1) Positive: N.S.<br><br>(2) Negative: Negative significant: EA<br><br>(3) Depression: N.S.                              | 5 |
| Schalinski 2015 <sup>39</sup><br>Germany | 62 psychotic spectrum disorder<br>32.2<br>30.6%                     | Prospective<br><br>Admission, 1 month & 4 months after | MACE<br><br>Composite & Subscale (PA, SA, EA, EN, PN)   | ICD-10                                                | t-test (total trauma)                                      | No           | (1) Positive (PANSS)<br><br>(2) Negative (PANSS)<br><br>(3) Disorganized (PANSS)<br><br>(4) Excitement | (1) Positive: N.S.<br><br>(2) Negative: N.S.<br><br>(3) Disorganised: N.S.<br><br>(4) Excitement Positive significant: EN | 6 |

|                                           |                                                                               |                                                        |                                                                                                  |                 |                                                 |                     |                                                                                                                |                                                                                                                                       |   |
|-------------------------------------------|-------------------------------------------------------------------------------|--------------------------------------------------------|--------------------------------------------------------------------------------------------------|-----------------|-------------------------------------------------|---------------------|----------------------------------------------------------------------------------------------------------------|---------------------------------------------------------------------------------------------------------------------------------------|---|
|                                           |                                                                               |                                                        |                                                                                                  |                 |                                                 |                     | (PANSS)                                                                                                        |                                                                                                                                       |   |
| Schalinski 2015B <sup>40</sup><br>Germany | 75 patients with schizophrenia spectrum disorder<br>31 (N/A)<br>34.7%<br>13.5 | Cross-sectional                                        | MACE scale<br><br>Composite                                                                      | ICD-10          | Random forest regression with conditional trees | Age                 | (1) Positive (PANSS)<br><br>(2) Negative (PANSS)                                                               | (1) Positive<br>Positive significant:<br>Composite CA<br><br>(2) Negative<br>Positive significant:<br>Composite CA                    | 4 |
| Schalinski 2019 <sup>41</sup><br>Germany  | 180 with schizophrenia<br>28.6<br>31.7%                                       | Cross-sectional                                        | MACE<br><br>Composite and subscales (overall abuse and overall neglect)                          | N/A             | Spearman's partial correlation                  | YES; age and gender | (1) Positive (PANSS)<br><br>(2) Negative (PANSS)                                                               | (1) Positive<br>Positive significant:<br>Composite CA, abuse and neglect<br><br>(2) Negative:<br>N.S.                                 | 6 |
| Schenkel 2005 <sup>42</sup><br>USA        | 40 with schizophrenia<br>41.9 (20-62)<br>37.5%<br>11.4                        | Cross-Sectional                                        | History of childhood maltreatment based on clinical interview and medical chart<br><br>Composite | DSM-IV          | <i>t-test</i>                                   | No                  | (1) Psychotic Disorganization (BPRS)<br><br>(2) Agitation/elation (BPRS)                                       | (1) Disorganisation:<br>N.S.<br><br>(2) Elation/agitation:<br>N.S.                                                                    | 4 |
| Seidenfaden 2017 <sup>43</sup><br>Denmark | 37 schizophrenia<br>32.3<br>54.1%                                             | Cross-Sectional                                        | CATS<br><br>Composite                                                                            | ICD-10          | Independent samples <i>t</i> -tests             | No                  | (1) Positive (PANSS)<br><br>(2) Negative (PANSS)<br><br>(3) Disorganized (PANSS)<br><br>(4) Excitement (PANSS) | (1) Positive<br>Positive significant: CA<br><br>(2) Negative:<br>N.S.<br><br>(3) Disorganised:<br>N.S.<br><br>(4) Excitement:<br>N.S. | 4 |
| Simpson 2019 <sup>44</sup><br>Australia   | 24 with acute FEP<br>19.54 (15-25)<br>41.66%                                  | Prospective (during acute FEP, and three months later) | CTQ<br><br>Composite                                                                             | SCID for DSM-IV | Correlation coefficients                        | No                  | (1) Positive (BPRS)                                                                                            | <i>No significant associations were observed within findings of analyses</i>                                                          | 5 |

|                                               |                                                                           |                                                         |                                                              |                                                                         |                                           |                                |                                                                                                                              |                                                                                                                                                               |   |
|-----------------------------------------------|---------------------------------------------------------------------------|---------------------------------------------------------|--------------------------------------------------------------|-------------------------------------------------------------------------|-------------------------------------------|--------------------------------|------------------------------------------------------------------------------------------------------------------------------|---------------------------------------------------------------------------------------------------------------------------------------------------------------|---|
| Stain 2013 <sup>45</sup><br>Norway            | 233 FEP<br>26.5 (18-65)<br>43.8%<br>11.5                                  | Cross-sectional                                         | BBTS<br>Composite                                            | The Structure d Clinical Interview for DSM-IV Axis I Disorders (SCID-I) | Mann-Whitney U                            | No                             | (1) Positive (PANSS)<br>(2) Negative (PANSS)<br>(3) Depressive (PANSS)<br>(4) Disorganised (PANSS)<br>(5) Excitative (PANSS) | <i>No significant associations were observed within findings of analyses</i>                                                                                  | 5 |
| Sun 2018 <sup>46</sup><br>Australia           | 66 FEP<br>20.18 (15-25)<br>54.5%                                          | Cross-sectional                                         | CTQ<br>Composite                                             | DSM-IV-TR                                                               | <i>Spearman rank correlation analysis</i> | No.                            | (1) Negative (PANSS)                                                                                                         | (1) Negative: N.S.                                                                                                                                            | 5 |
| Ucok 2007 <sup>47</sup><br>Turkey             | 57 FEP<br>23.03<br>49.1%                                                  | Prospective Admission, then monthly visit for 6 months. | CTQ<br>Composite and subscale (EA, SA, PA, EN, PN)           | DSM-IV                                                                  | Correlation analysis                      | No                             | (1) Positive (SAPS)<br>(2) Negative (SANS)                                                                                   | (1) Positive Positive significant: EA, SA, PA, EN, PN<br>(2) Negative: N.S.                                                                                   | 4 |
| Van Dam 2014 <sup>48</sup><br>The Netherlands | 131 patients with psychotic disorder<br>31.19(16-50)<br>16%               | Cross-sectional                                         | CTQ-SF<br>Composite                                          | DSM-IV                                                                  | Hierarchical multiple regression analysis | Age, gender, attachment scales | (1) Positive (SAPS)<br>(2) Negative (SANS)                                                                                   | (1) Positive Positive significant: Composite CT<br>(2) Negative Positive significant: Composite CT                                                            | 6 |
| Van Dam 2015 <sup>49</sup><br>The Netherland  | 1119 patients with non-affective psychotic disorder<br>27.6(16-50)<br>24% | Prospective 3 years                                     | CTQ-SF<br>Composite and subscale (overall abuse and neglect) | DSM-IV                                                                  | Multilevel regression analysis            | No                             | (1) Positive (PANSS)<br>(2) Negative (PANSS)<br>(3) Depression (CDSS)                                                        | (1) Positive Positive significant: Composite CT<br>(2) Negative Positive significant: Composite CT<br>(3) Depression Positive significant: SA, EA, PA, PN, EN | 6 |
| Weijers 2018 <sup>50</sup><br>Netherlands     | 87 non-affective psychosis<br>31.7 (19-57)<br>35.6                        | Cross-Sectional                                         | CECA<br>Composite                                            | DSM-IV & comprehensive Assessment of History and Symptoms interview     | Spearman's correlation                    | Yes; mentalizing (as mediator) | (1) Positive (PANSS)<br>(2) Negative (PANSS)                                                                                 | (1) Positive Positive significant: Composite CT<br>(2) Negative Positive significant: Composite CT                                                            | 5 |

*note.* FEP= First Episode Psychosis; CTQ=Childhood Trauma Questionnaire; EA= Emotional Abuse; SA= Sexual Abuse; PA= Physical Abuse; EN= Emotional Neglect; PN= Physical Neglect; DSM-IV= Diagnostic and Statistical Manual for mental disorders-; PANSS= Positive and Negative Syndrome Scale; YMRS= Young Mania Rating Scale; CA= Childhood Adversity; CEQA.Q = Childhood Experience of Care and Abuse Questionnaire; ICD-10= International Classification of Diseases- 10<sup>th</sup> revision; N.S.=

non-significant; SES= Socioeconomic status; MADRS= The Montgomery-Åsberg Depression Rating Scale; ANOVA= Analysis of Variance; DSM-IV-TR= Diagnostic and Statistical Manual of Mental Disorders- 4<sup>th</sup> Edition- text revision; CESD-R= Center for Epidemiologic Studies Depression Scale- Revised; BDI= Beck Depression Inventory; CTQ-SF= Childhood Trauma Questionnaire-Short Form; BPRS= Brief Psychiatric Rating Scale; ANCOVA= Analysis of Covariance; CAPE= The Community Assessment of Psychic Experience; DASS21= The Depression, Anxiety and Stress Scale - 21 Items; ETISR-SF= Early Trauma Inventory Self Report - Short Form; DI-PAD= Diagnostic Interview for Psychosis and Affective Disorders; CAQ=Childhood Adversity Questionnaire; COMT= Catechol-O-methyltransferase; DIP=Diagnostic Interview for Psychosis; BBTS = Brief Betrayal Trauma Survey; THQ= The Trauma History Questionnaire; SCID=Structured Clinical Interview for DSM; CEQ=The Childhood Experience Questionnaire; SANS=Scale for the Assessment of Negative Symptoms; CATS= Childhood and Adolescent Trauma Screen; PHQ-9= Patient Health Questionnaire-9; CDSS= Calgary Depression Scale for Schizophrenia; SAPS= Scales for the Assessment of Positive Symptoms; ETI= Early Trauma Inventory; MACE=Maltreatment and Abuse Chronology of Exposure scale.

**Figure S1.** PRISMA flow diagram of database search

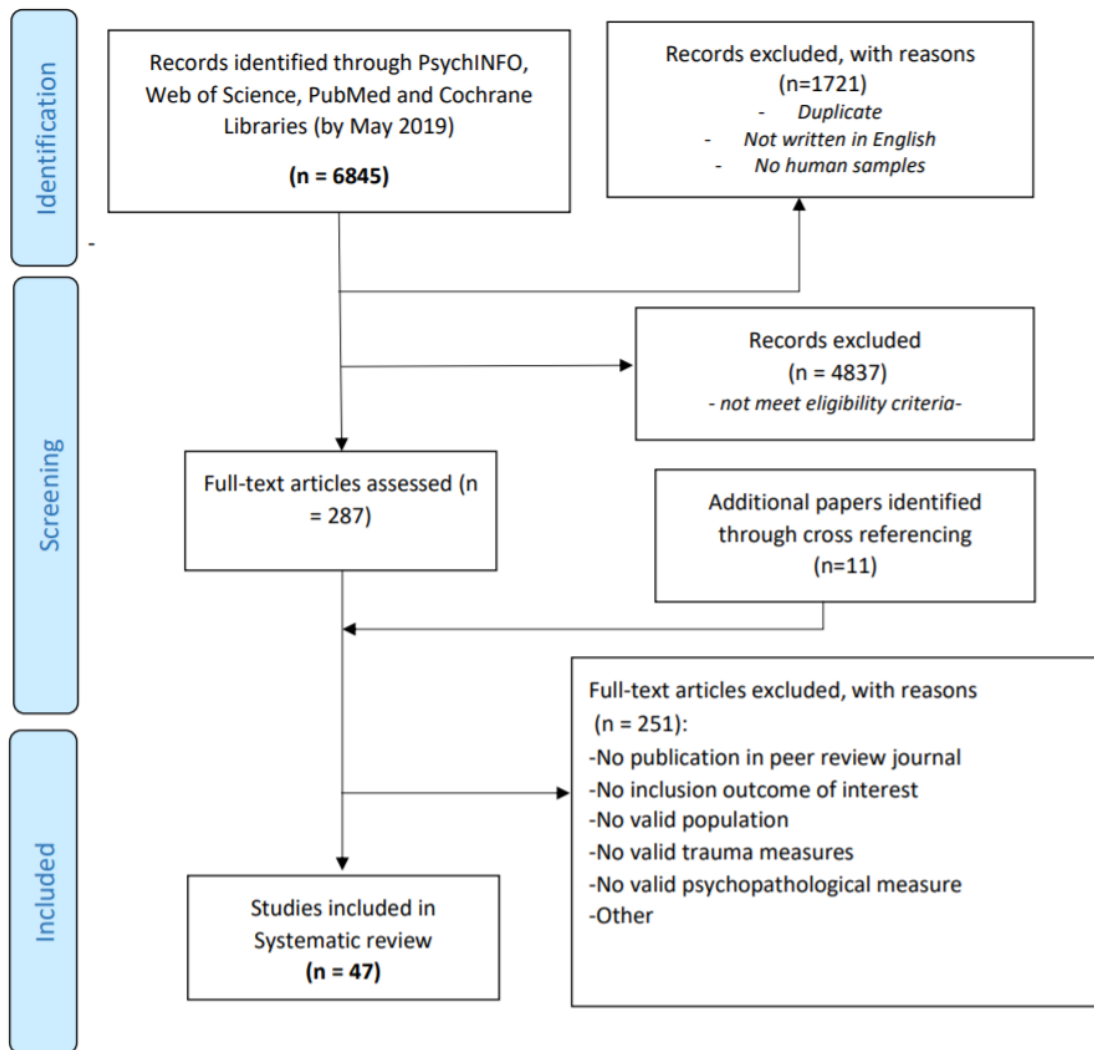



**Table S6.** Operationalization of the symptom dimensions (positive, negative, depressive, disorganized, manic/excited) in people with psychosis

| Symptom dimension | Instruments                     | Domains used to operationalise                                                                                                                                                                         | Utilised by                                                                                                                                                                                                                                                                                                                                                                                                   | Total number of studies |
|-------------------|---------------------------------|--------------------------------------------------------------------------------------------------------------------------------------------------------------------------------------------------------|---------------------------------------------------------------------------------------------------------------------------------------------------------------------------------------------------------------------------------------------------------------------------------------------------------------------------------------------------------------------------------------------------------------|-------------------------|
| Positive          | PANSS                           | <i>7 domains:</i> Delusions, Conceptual disorganization, Hallucinations, Excitement, Grandiosity, Suspiciousness/persecution, Hostility                                                                | Alameda et al. (2016), Alameda et al. (2018), Baudin et al. (2011), Bendall et al. (2011), Bendall et al. (2013), Chae et al. (2015), Commachio et al. (2018), Duhig et al. (2015), Heins et al. (2011), Kilcommons et al. (2017), Kumari et al. (2013), Rajkumar et al. (2015), Schalinski et al. (2015), Schalinski et al. (2015B), Schalinski et al. (2019), Van dam et al. (2015), Weijers et al. (2018). | 17                      |
|                   | Adapted 5 factor-model of PANSS | <i>4 domains:</i> Delusion, hallucinations, grandiose & thoughts.                                                                                                                                      | Aas et al. (2015), Ajnakina et al. (2016), Bi et al. (2018), Haahr et al. (2018), Lysaker et al. (2001), Lysaker et al., (2005), Mohammadzadeh et al. (2019), Ruby et al. (2017), Stain et al. (2013),                                                                                                                                                                                                        | 9                       |
|                   | SAPS                            | <i>4 domains:</i> Hallucination, delusion, bizarre behaviour and positive formal thought disorder                                                                                                      | Ramsay et al. (2011), Sahin et al, (2013), Sar et al. (2010), Sayin et al. (2013), Ucok et al. (2007), Vam Dam et al. (2014),                                                                                                                                                                                                                                                                                 | 6                       |
|                   | Adapted BPRS scale (a)          | <i>5 domains:</i> Suspiciousness, hallucinations, unusual thought content, bizarre behaviour and conceptual disorganization                                                                            | Colip (2013), Pruessner et al. (2019), Simpson et al. (2019)                                                                                                                                                                                                                                                                                                                                                  | 3                       |
|                   | Adapted BPRS scale (b)          | <i>4 domains:</i> Hallucinations, unusual thought content, bizarre behaviour and conceptual disorganization.                                                                                           | Lindgren et al. (2017)                                                                                                                                                                                                                                                                                                                                                                                        | 1                       |
|                   | Adapted PANSS model (b)         | <i>9 domains:</i> Delusions, hallucinations, unusual thought content, suspiciousness, grandiosity, somatic concern, active social avoidance, difficulty in abstraction, lack of judgement and insight. | Seidenfaden et al. (2017)                                                                                                                                                                                                                                                                                                                                                                                     | 1                       |
|                   | DIP                             | <i>3 domains:</i> lifetime hallucination, delusion and subjective thought disorder                                                                                                                     | McCabe et al., (2012)                                                                                                                                                                                                                                                                                                                                                                                         | 1                       |
|                   | Adapted DIP scale               | <i>2 domains:</i> Lifetime hallucinations and delusions                                                                                                                                                | Green et al. (2014)                                                                                                                                                                                                                                                                                                                                                                                           | 1                       |
|                   | CAPE                            | <i>5 domains:</i> Hallucinations/perceptual abnormalities, unusual thought                                                                                                                             | Derosse (2014)                                                                                                                                                                                                                                                                                                                                                                                                | 1                       |

|            |                                 |                                                                                                                                                                                                                                       |                                                                                                                                                                                                                                                                                                                                                                                                                                                   |    |
|------------|---------------------------------|---------------------------------------------------------------------------------------------------------------------------------------------------------------------------------------------------------------------------------------|---------------------------------------------------------------------------------------------------------------------------------------------------------------------------------------------------------------------------------------------------------------------------------------------------------------------------------------------------------------------------------------------------------------------------------------------------|----|
|            |                                 | content, non-bizarre ideas, grandiosity, paranoia/persecutory delusions                                                                                                                                                               |                                                                                                                                                                                                                                                                                                                                                                                                                                                   |    |
| Negative   | PANSS                           | 7 domains: Blunted affect, emotional withdrawal, poor rapport, passive/apathetic social withdrawal, difficulty in abstract thinking, lack of spontaneity/flow of conversation and stereotyped thinking.                               | Aas et al. (2015), Ajnakina et al. (2016), Alameda et al. (2016), Alameda et al. (2018), Baudin et al. (2011), Bendall et al. (2011), Bendall et al. (2013), Chae et al. (2015), Commachio et al. (2018), Duhig et al. (2015), Heins et al. (2011), Kumari et al. (2013), Rajkumar et al. (2015), Schalinski et al. (2015), Schalinski et al. (2015B), Schalinski et al. (2019), Sun et al. (2018), Van dam et al. (2015), Weijers et al. (2018). | 19 |
|            | Adapted 5 factor-model of PANSS | 6 domains: Blunted affect, emotional withdrawal, poor rapport, passive/apathetic social withdrawal, lack of spontaneity, motor retardation.                                                                                           | Aas (2016), Ajnakina (2016), Bi (2018), Haahr et al. (2018), Lysaker et al. (2001), Mohammadzadeh et al. (2019), Ruby et al. (2017), Stain (2013).                                                                                                                                                                                                                                                                                                | 8  |
|            | SANS                            | 5 domains: Affective blunting, alogia, avolition/apathy, anhedonia/asociality and attention.                                                                                                                                          | McCabe et al. (2012), Ramsay et al. (2011), Sar et al. (2010), Sayin et al. (2013), Ucok et al. (2007), Van Dam et al. (2014).                                                                                                                                                                                                                                                                                                                    | 6  |
|            | Adapted BPRS scale              | 4 domains: Blunted affect, alogia, anhedonia and avolition.                                                                                                                                                                           | Lindgren et al. (2017), Pruessner et al. (2019).                                                                                                                                                                                                                                                                                                                                                                                                  | 2  |
|            | Adapted PANSS model (b)         | 10 domains: Lack of spontaneity, blunted affect, emotional withdrawal, apathetic social withdrawal, motor retardation, poor rapport, active social avoidance, conceptual disorganisation, disturbance of volition, uncooperativeness. | Seidenfaden et al. (2017)                                                                                                                                                                                                                                                                                                                                                                                                                         | 1  |
|            | Adapted DIP scale               | 4 domains: Restricted affect, blunted affect, thought disorder and social functioning (social withdrawal and lack of interest).                                                                                                       | Green et al. (2014)                                                                                                                                                                                                                                                                                                                                                                                                                               | 1  |
|            | CAPE                            | 7 domains: Blunted affect, asociality, avolition, fatigue, lack of spontaneity, self-neglect and anhedonia.                                                                                                                           | Derosse (2014)                                                                                                                                                                                                                                                                                                                                                                                                                                    | 1  |
| Depressive | Adapted 5 factor model of PANSS | 3 domains: Anxiety, guilt & depression                                                                                                                                                                                                | Aas (2016), Ajankina (2016), Alameda (2018), Haahr (2018), Stain (2013).                                                                                                                                                                                                                                                                                                                                                                          | 5  |
|            | BDI-II                          | 4 domains: Cognitive, affective, somatic and vegetative symptoms of depression                                                                                                                                                        | Chae (2015), Hardy (2016), Lindgren (2017), Mohammadzadeh (2019), Offen (2002)                                                                                                                                                                                                                                                                                                                                                                    | 5  |
|            | CDSS                            | 6 domains: Depression, hopelessness, self-depreciation, guilt, early awakening and                                                                                                                                                    | Rajkumar (2015), Sayin (2013), van Dam (2015)                                                                                                                                                                                                                                                                                                                                                                                                     | 3  |

|              |                                                                                   |                                                                                                                                                                                                                                       |                                                                                                                                   |   |
|--------------|-----------------------------------------------------------------------------------|---------------------------------------------------------------------------------------------------------------------------------------------------------------------------------------------------------------------------------------|-----------------------------------------------------------------------------------------------------------------------------------|---|
|              |                                                                                   | suicide.                                                                                                                                                                                                                              |                                                                                                                                   |   |
|              | MADRS                                                                             | 10 domains: Sadness, inner tension, sleep, appetite, concentration, anhedonia, concentration, fatigue, suicidal thoughts and pessimism.                                                                                               | Alameda (2016), Alameda (2017)                                                                                                    | 2 |
|              | DASS21                                                                            | 7 domains: dysphoria, hopelessness, devaluation of life, self-deprecation, lack of interest / involvement, anhedonia and inertia.                                                                                                     | Duhig (2015)                                                                                                                      | 1 |
|              | DI-PAD                                                                            | 11 domains: Dysphoria, anhedonia, changes in speech/behaviour, guilt, fatigue, concentration, libido, appetite, weight change, sleep and morning depression.                                                                          | Gabino (2018)                                                                                                                     | 1 |
|              | PHQ-9                                                                             | Anhedonia, low mood, sleep, fatigue, appetite, negative self-beliefs, concentration, changes in movement/speech and suicidality.                                                                                                      | Okubo (2017)                                                                                                                      | 1 |
|              | Adapted BPRS scale                                                                | 4 domains: Depression, anxiety, guilt and suicidality.                                                                                                                                                                                | Pruessner (2019)                                                                                                                  | 1 |
|              | CESD-R                                                                            | 9 domains: Depressed mood, anhedonia, weight changes, insomnia, fatigue, psychomotor difficulties, worthlessness/guilt, diminished concentration and suicidality.                                                                     | Bendall (2011)                                                                                                                    | 1 |
|              | CAPE                                                                              | 7 domains: Sadness, pessimism, hopelessness, suicidality, guilt, tension and sense of self-failure.                                                                                                                                   | Derosse (2014)                                                                                                                    | 1 |
| Disorganised | Adapted PANSS model (Wallwork, Fortgang, Hashimoto, Weinberger & Dickinson, 2012) | 3 domains: Conceptual disorganisation, difficulty in abstraction and poor attention.                                                                                                                                                  | Aas (2016), Ajnakina (2016), Alameda (2018), Baudin (2016), Lysaker et al. (2001), Schalinski et al. (2015), Stain et al. (2013). | 7 |
|              | Adapted PANSS model (van der Gaag et al., 2006)                                   | 10 domains: Unusual thought content, stereotype thinking, poor attention, disorientation, conceptual disorganisation, difficulty in abstraction, mannerism, lack of judgement and insight, disturbance of volition and preoccupation. | Seidenfaden et al. (2017)                                                                                                         | 1 |
|              | Adapted BPRS scale                                                                | 5 domains: Bizarre behaviour, distractibility, conceptual disorganization, self-neglect,                                                                                                                                              | Schenkel et al. (2005)                                                                                                            | 1 |

|               |                                                 |                                                                                                                                            |                                                                                                                               |   |
|---------------|-------------------------------------------------|--------------------------------------------------------------------------------------------------------------------------------------------|-------------------------------------------------------------------------------------------------------------------------------|---|
|               |                                                 | mannerisms/posturing.                                                                                                                      |                                                                                                                               |   |
| Manic/Excited | Adapted PANSS model                             | 4 domains: Uncooperativeness, poor impulse control, excitement, and hostility                                                              | Ajnakina (2016), Alameda (2018), Baudin (2016), Bi (2018), Haahr (2018), Schalinski (2015a), Seidenfaden (2017), Stain (2013) | 8 |
|               | YMRS                                            | 10 domains: Insight, aggression, psychosis, appearance, thought disorder, pressured speech, mood, sleep, libido and motor activity.        | Aas et al. (2016), Alameda (2016)                                                                                             | 2 |
|               | Adapted PANSS model (van der Gaag et al., 2006) | 8 domains: Grandiosity, poor rapport, active social avoidance, poor impulse control, excitement, hostility, uncooperativeness and tension. | Seidenfaden et al. (2017)                                                                                                     | 1 |
|               | Adapted BPRS scale (a)                          | 7 domains: Motor hyperactivity, excitement, distractibility, tension, elated mood, grandiosity and bizarre behaviour.                      | Pruessner (2019)                                                                                                              | 1 |
|               | Adapted BPRS scale (b)                          | 3 domains: Elated mood, motor hyperactivity and suicidality.                                                                               | Schenkel et al. (2003)                                                                                                        | 1 |
|               | DI-PAD                                          | 8 domains: Mood, pressured speech, self-esteem, sociability, sleep, distractibility, motor hyperactivity, thought capacity.                | Gabinio (2018)                                                                                                                | 1 |

Note. Acronyms can be found in Table S4 Footnote

### **Negative symptoms**

The PANSS as a measure of symptom severity, was utilised by the majority of studies examining the negative symptom dimension (51.35%, n= 19). Whilst its 7 domains heavily overlaps with those utilised by alternative measures, it is the only instrument to assess individuals' thought capacities. Indeed, the adapted PANSS model, the second most commonly utilised measure (21.62%, n= 8), removed stereotyped thinking and difficulty in abstract thinking in the conceptualisation of negative symptoms. However, a domain initially categorised within general psychopathology, motor retardation, was included in this adaptation. Nonetheless, blunted affect appears to be a crucial symptom when examining negative symptoms, as it is the only domain to be commonly measured amongst all instruments.

### **Positive Symptoms**

Similarly, out of the 9 measures of positive symptoms that have been utilised between included studies, PANSS was the most frequently used assessment tool (42.5%, n = 17). Relative to other measures, its inclusion of excitement and hostility sets a distinct conceptualisation of positive symptoms. Whilst the number of domains utilised between measures ranged from 2-9, hallucinations and delusions have been observed to be a constant indicator of positive symptom severity.

### ***Depressive symptoms***

Two instruments have been identified to have equally been the most utilised measure of depressive symptoms; adapted PANSS model and BDI-II. Whilst the former is solely based on mood, the BDI-II additionally incorporates somatic and cognitive presentations of depression. This mixture of affective symptoms and disrupted functioning reflects the operationalisation of depressive symptoms that have been employed by the many remaining measures. For instance, disrupted sleep and low mood.

### ***Manic Symptoms***

Elated mood/excitement has been consistently assessed amongst all measures of manic symptoms. Aside from this, there is a lack of consistency in how the various measures have operationalised this symptom domain. For instance, grandiosity, commonly associated with positive symptoms, have been incorporated into numerous measures of manic symptoms. Whereas, other studies shift focus to symptoms of motor hyperactivity. Nonetheless, it appears that measures typically incorporate a mixture of symptoms that tend to operationalise both positive and negative symptoms.

### ***Disorganized symptoms***

The operationalisation of disorganised symptoms within the literature is heavily influenced by symptoms within the PANSS, albeit differing factor models were utilised. The key distinction between the adapted PANSS scales and the one other utilised measure, adapted BPRS scale, was the inclusion of self-neglect as a relevant domain within the latter scale. Nevertheless, whilst the number of domains used to operationalise this symptom dimension largely varied, conceptual disorganisation was assessed in all three measures used between studies examining childhood adversity and disorganised symptoms.

## Forest plots

**Figure S2.** Forest plot showing relationship between general adversity and positive symptoms

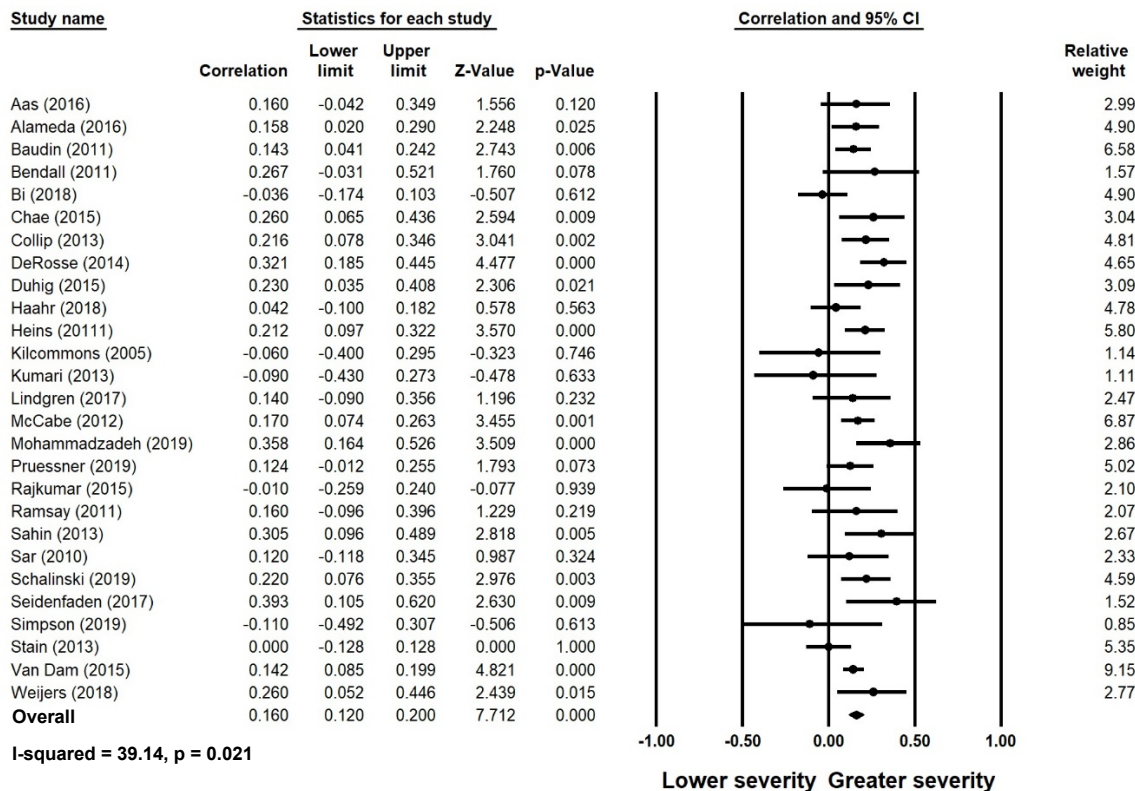

**Figure S3.** Forest plot showing relationship between sexual abuse (SA) and positive symptoms

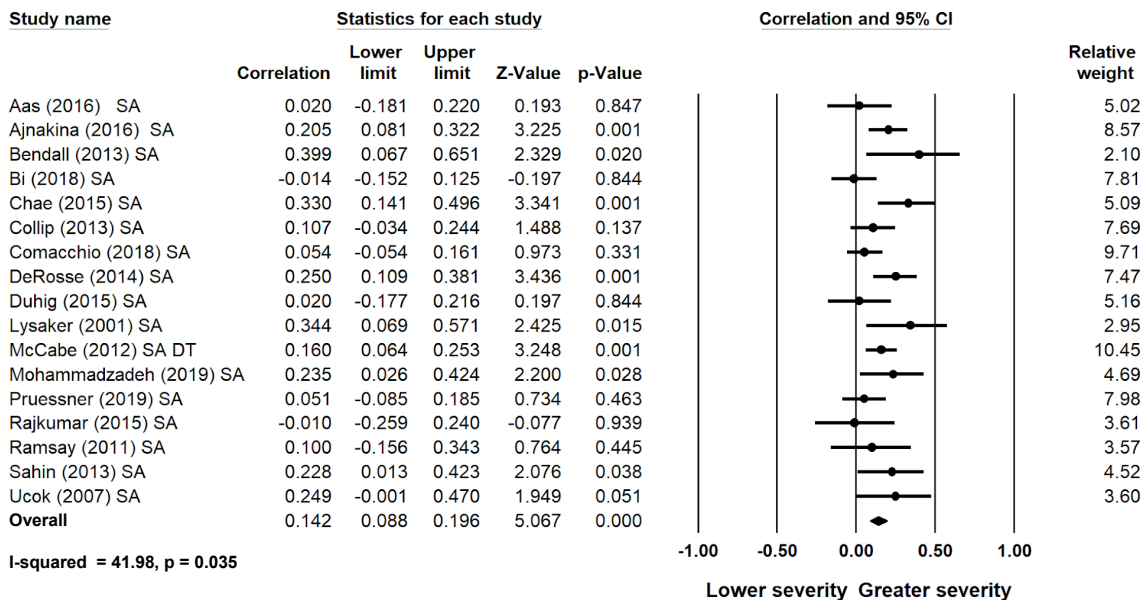

**Figure S4.** Forest plot showing relationship between physical abuse (PA) and positive symptoms

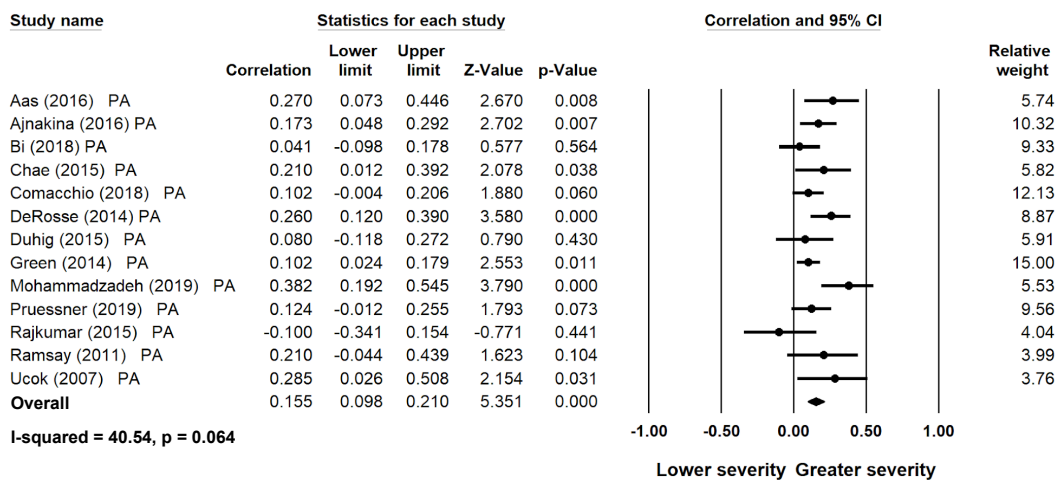

**Figure S5.** Forest plot showing relationship between emotional abuse (EA) and positive symptoms

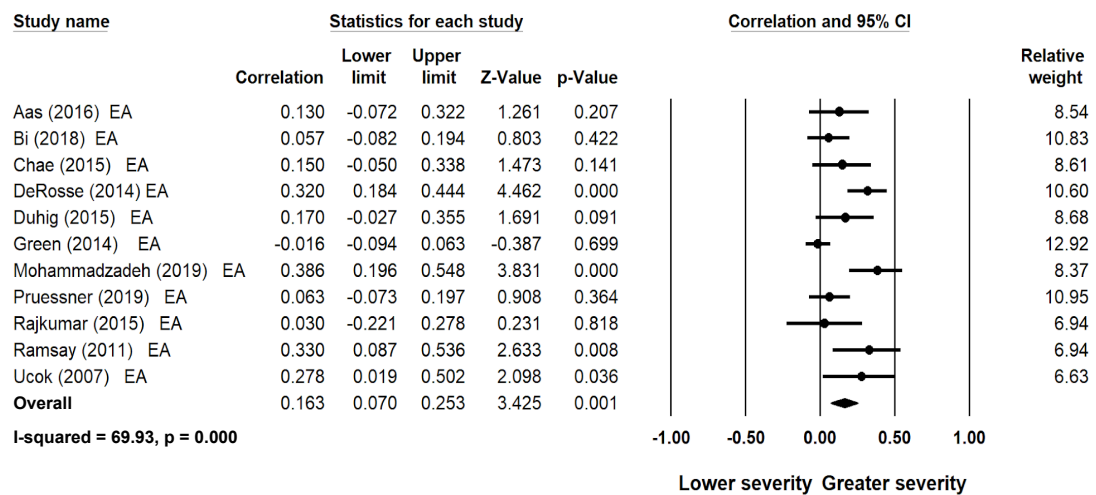

**Figure S6.** Forest plot showing relationship between physical neglect (PN) and positive symptoms

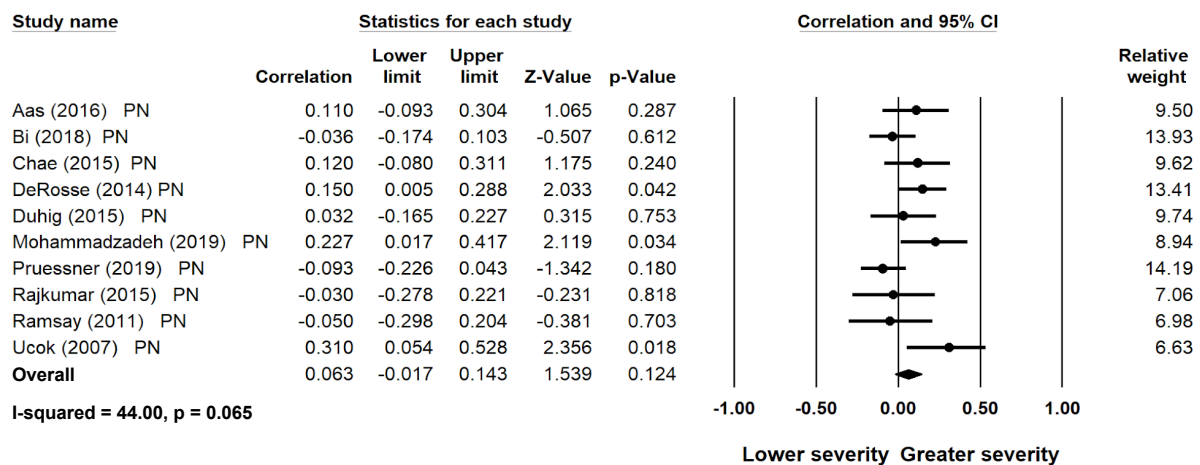

**Figure S7.** Forest plot showing relationship between emotional neglect (EN) and positive symptoms

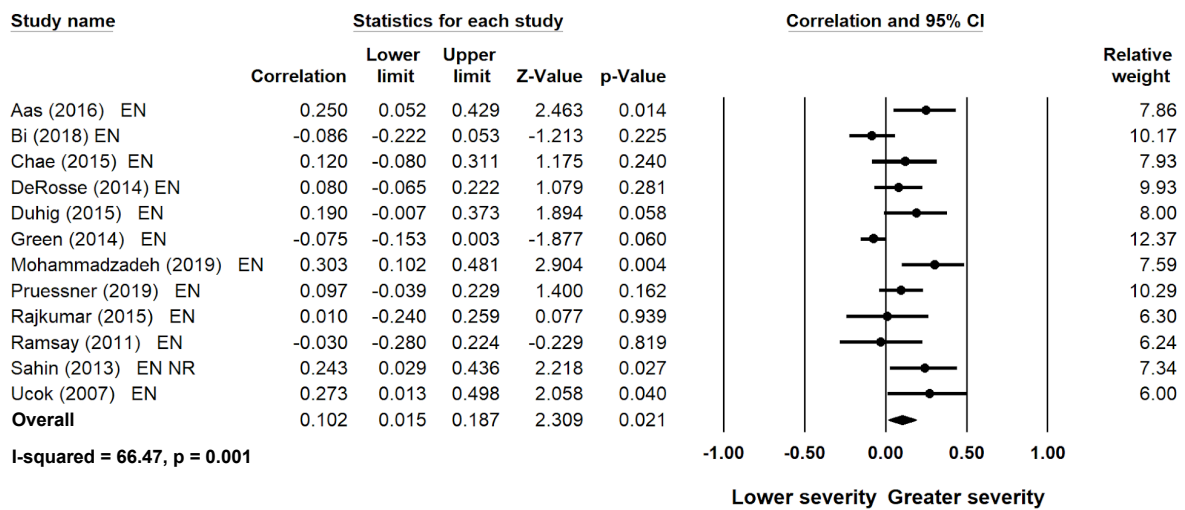

**Figure S8.** Forest plot showing relationship between general adversity and negative symptoms

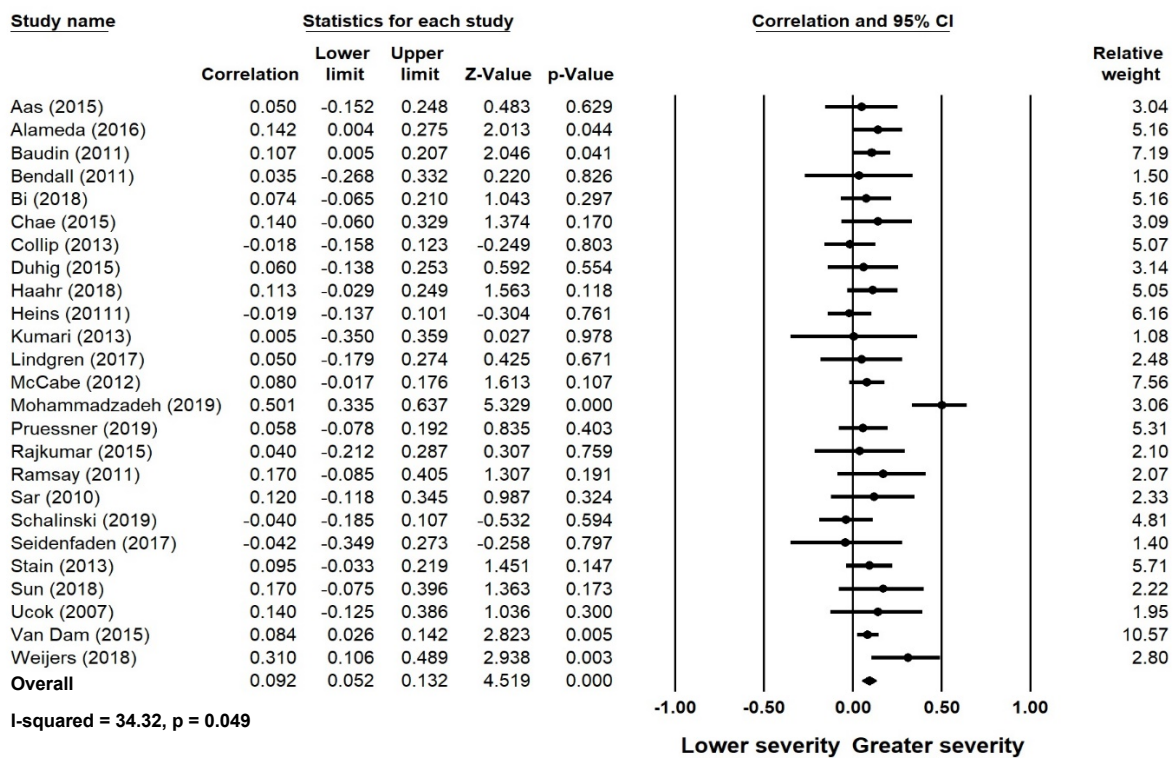



**Figure S9.** Forest plot showing relationship between sexual abuse (SA) and negative symptoms

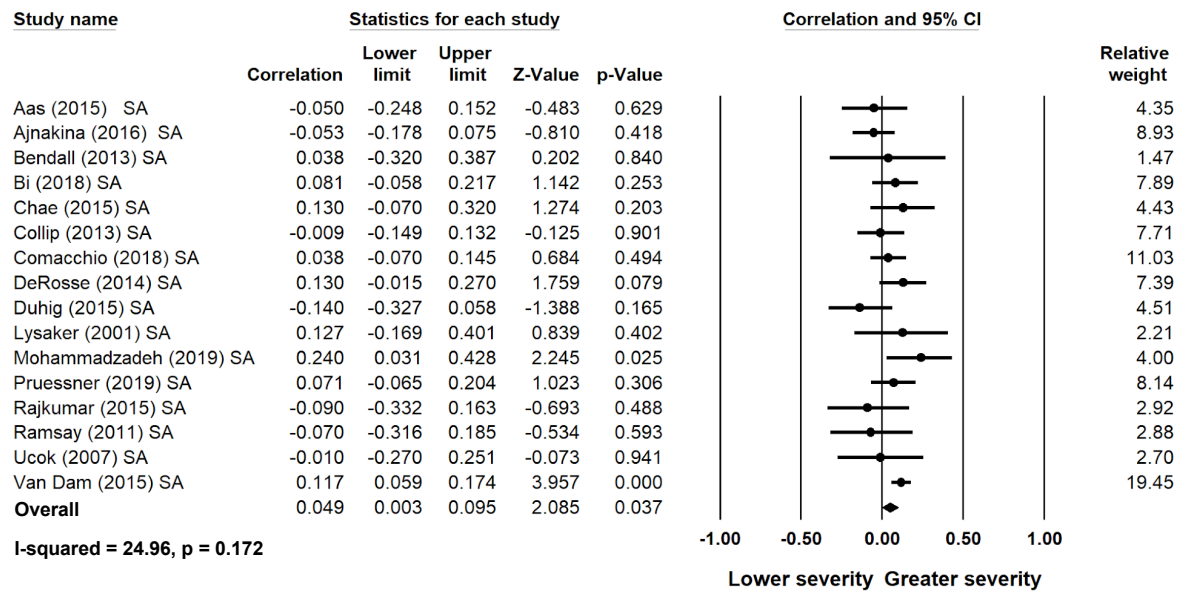

**Figure S10.** Forest plot showing relationship between physical abuse (PA) and negative symptoms.

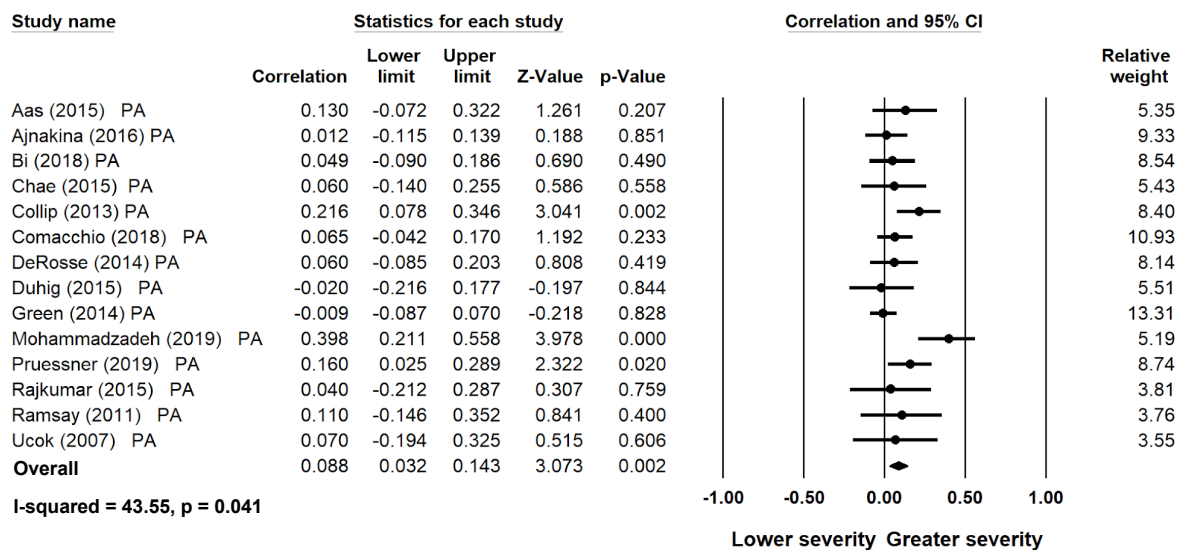

**Figure S11.** Forest plot showing relationship between emotional abuse (EA) and negative symptoms

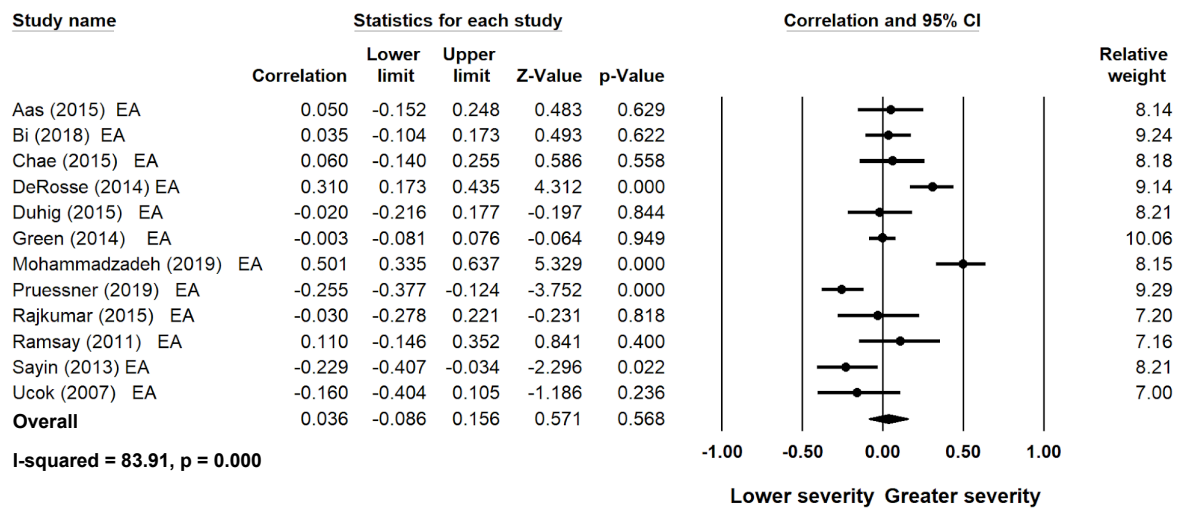

**Figure S12.** Forest plot showing relationship between physical neglect (PN) and negative symptoms

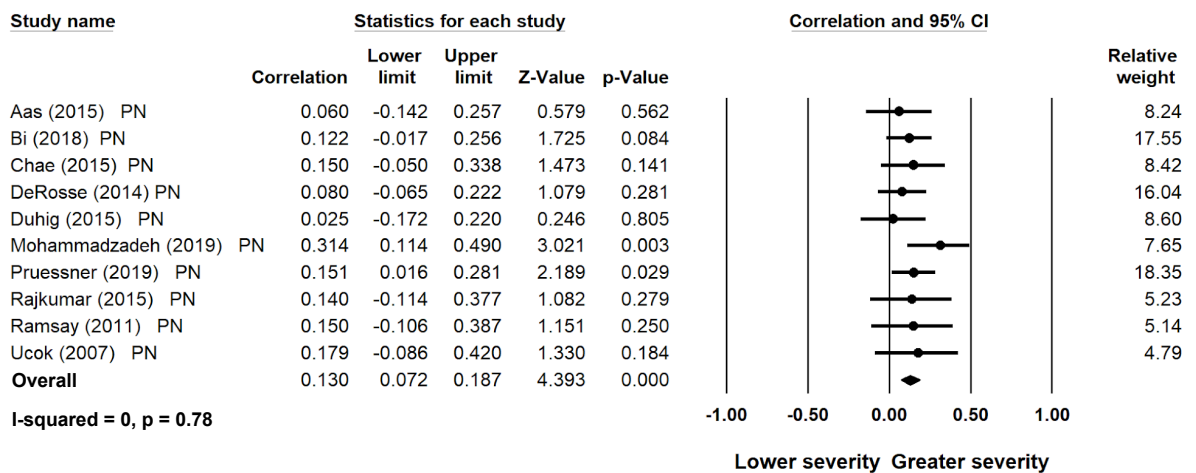

**Figure S13.** Forest plot showing relationship between emotional neglect (EN) and negative symptoms

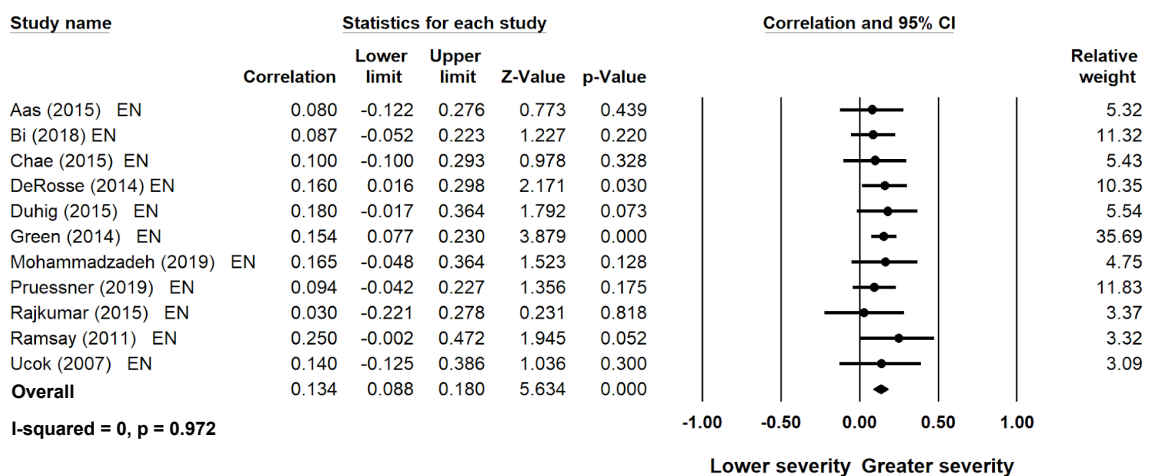

**Figure S14.** Forest plot showing relationship between general adversity and depressive symptoms

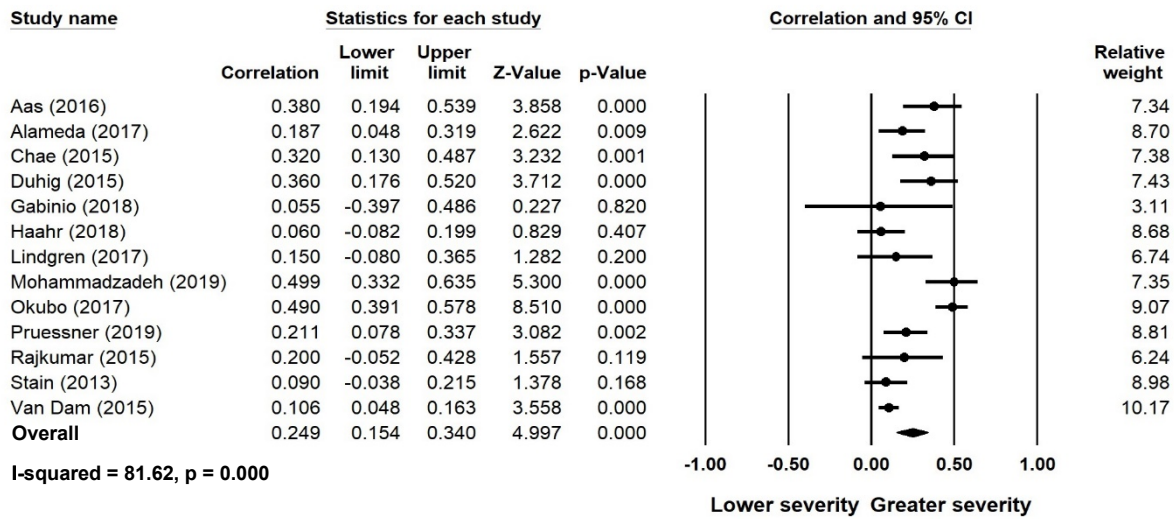

**Figure S15.** Forest plot showing relationship between sexual abuse (SA) and depressive symptoms

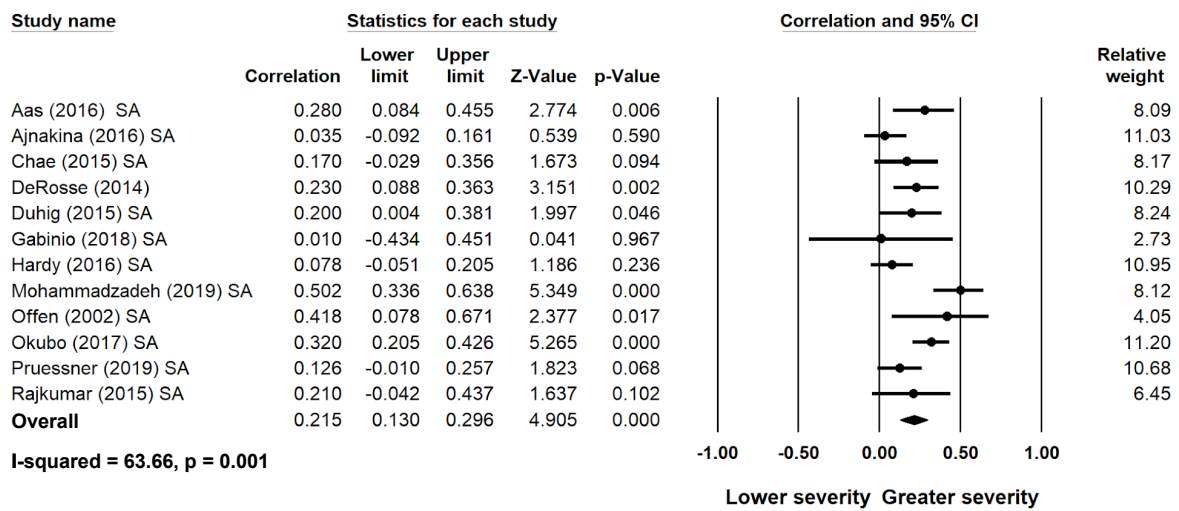

**Figure S16.** Forest plot showing relationship between physical abuse (PA) and depressive symptoms

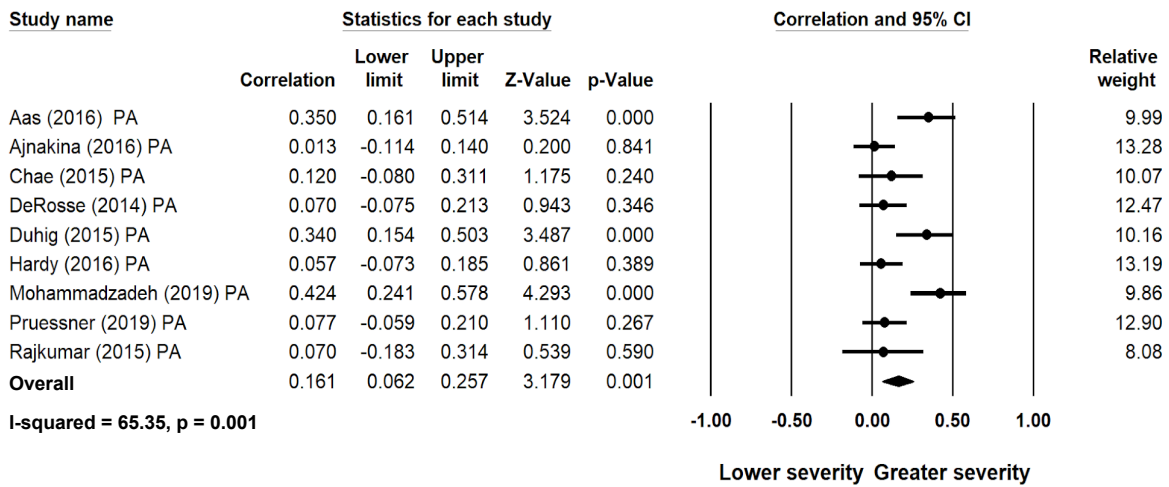

**Figure S17.** Forest plot showing relationship between emotional abuse (EA) and depressive symptoms

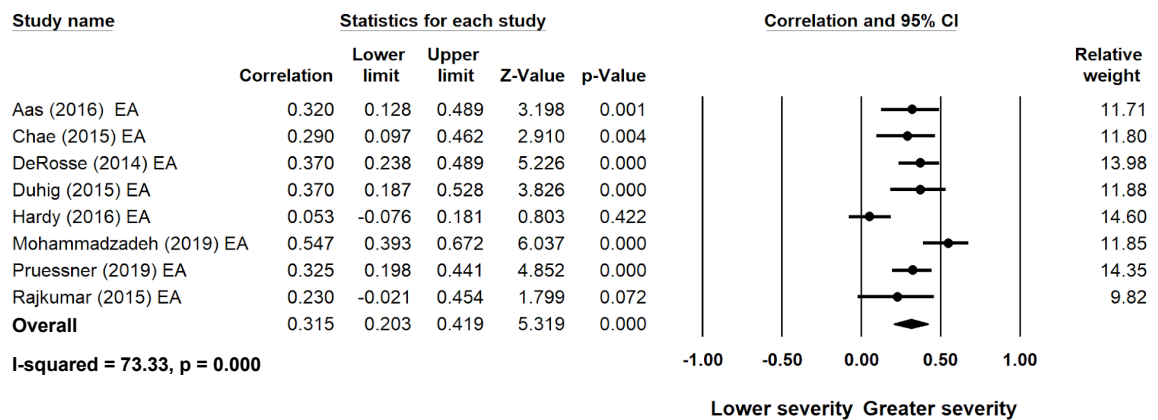

**Figure S18.** Forest plot showing relationship between physical neglect (PN) and depressive symptoms

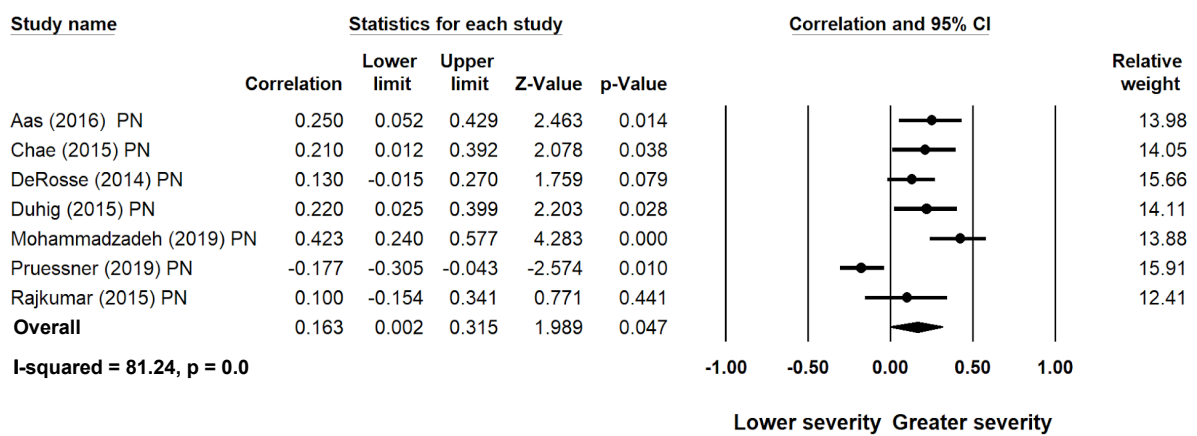

**Figure S19.** Forest plot showing relationship between emotional neglect (EN) and depressive symptoms

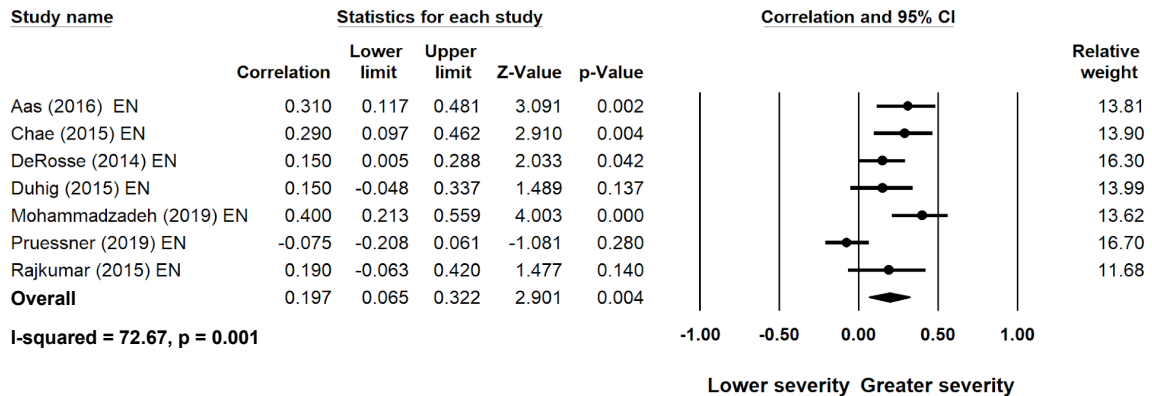

**Figure S20.** Forest plot showing relationship between general adversity and disorganised symptoms

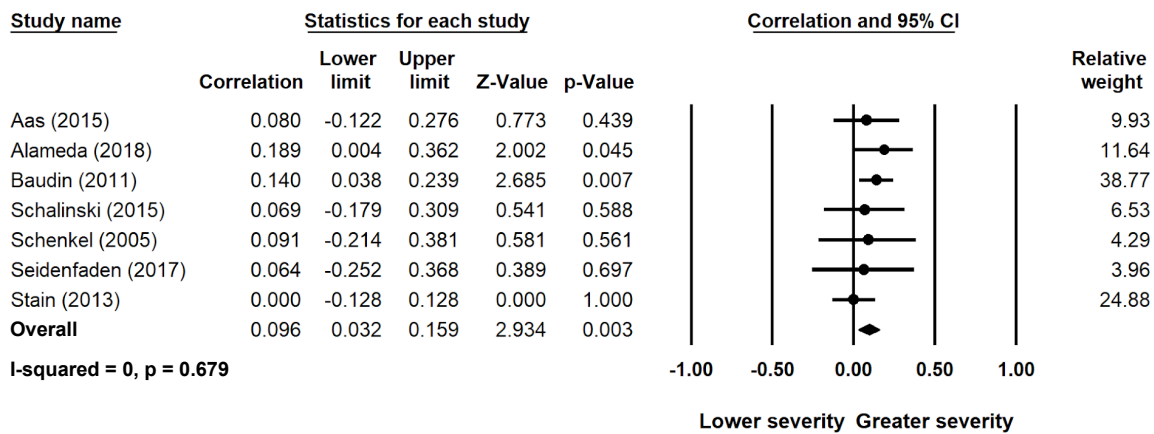

**Figure S21.** Forest plot showing relationship between sexual abuse (SA) and disorganised symptoms

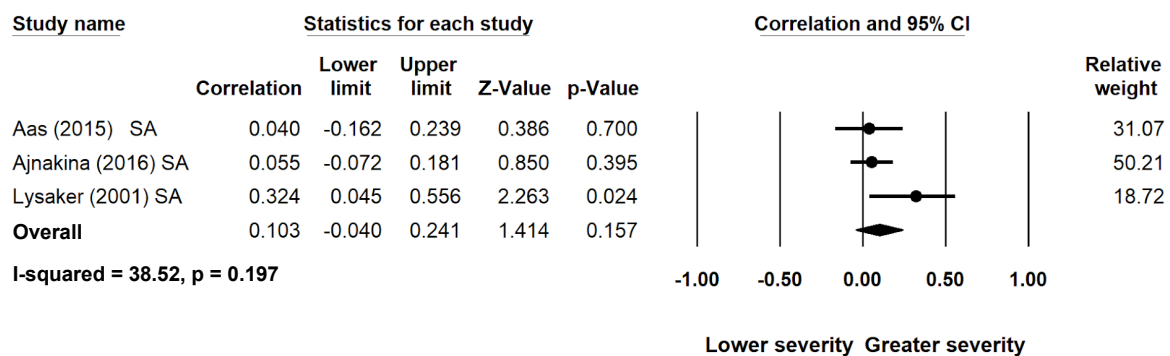

**Figure S22.** Forest plot showing relationship between general adversity and mania

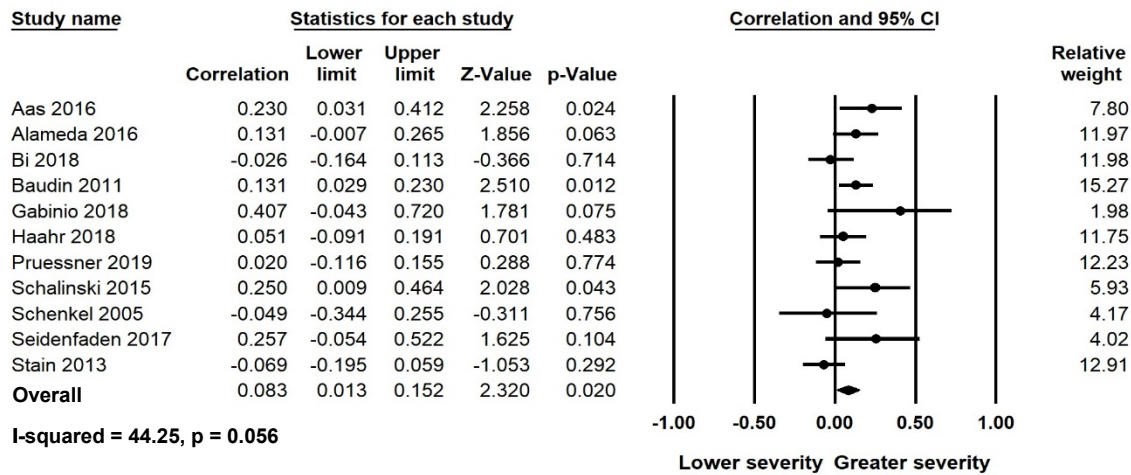

**Figure S23.** Forest plot showing relationship between sexual abuse (SA) and mania

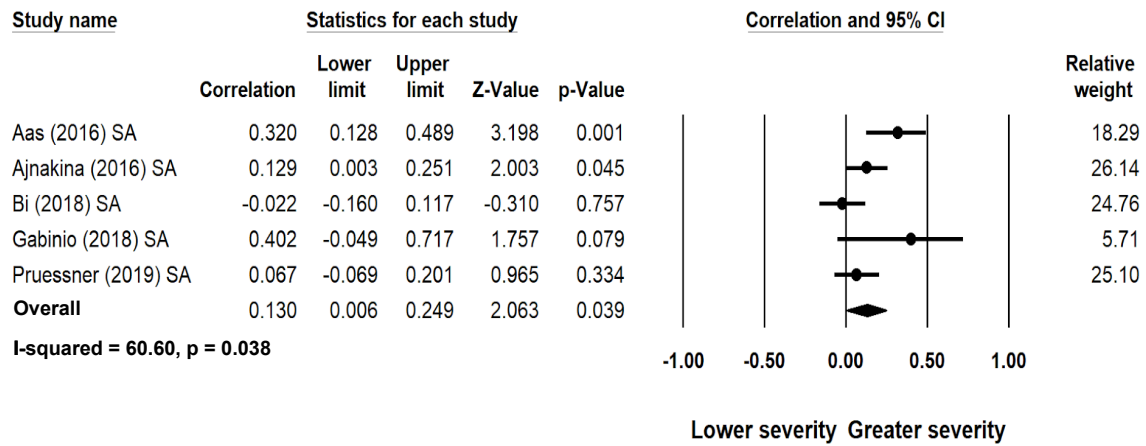

**Figure S24.** Forest plot showing relationship between physical abuse (PA) and mania

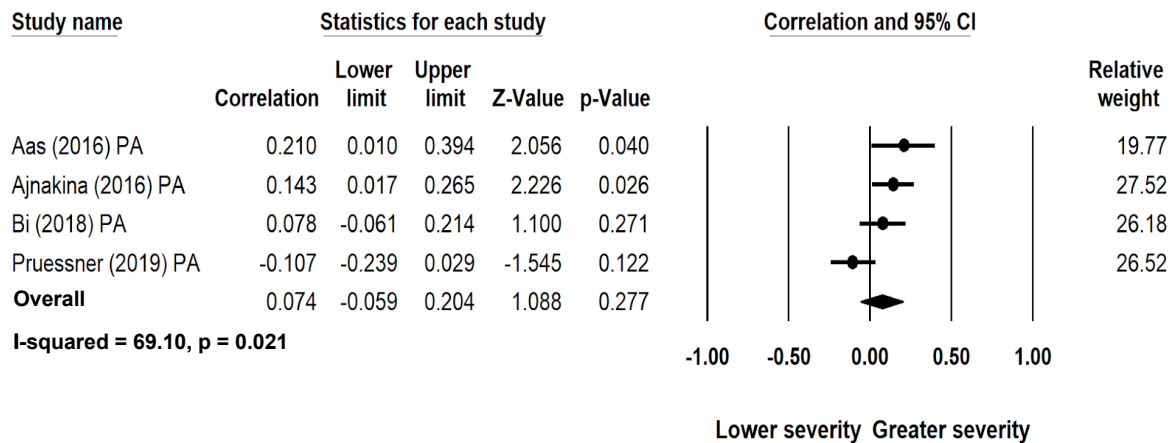

**Figure S25.** Forest plot showing relationship between emotional abuse (EA) and mania

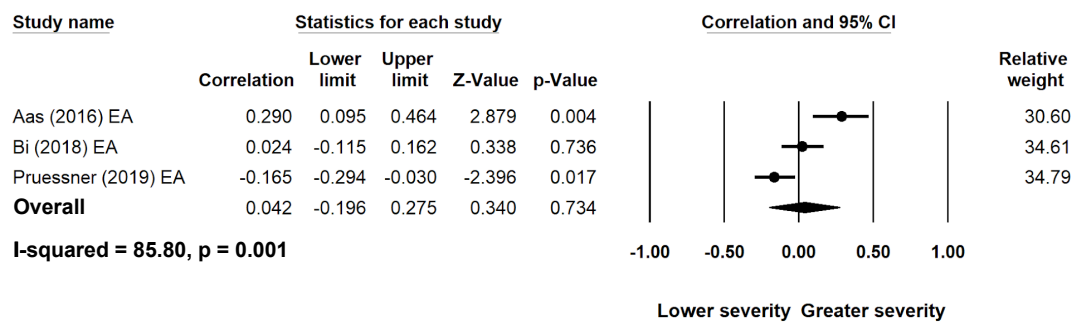

**Figure S26.** Forest plot showing relationship between physical neglect (PN) and mania

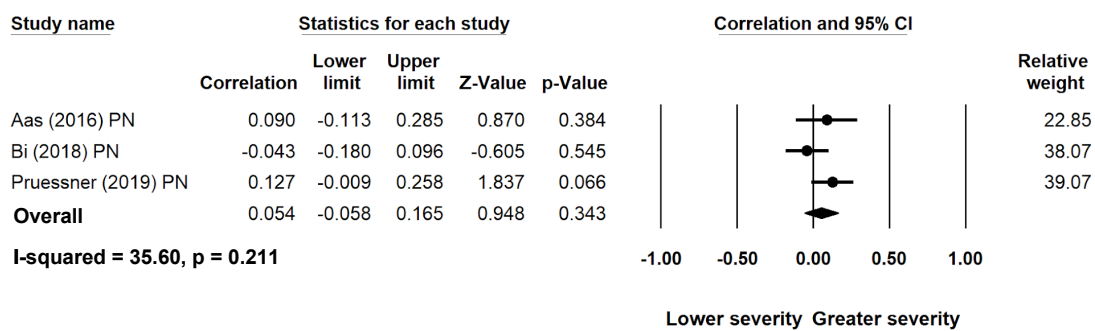

**Figure S27.** Forest plot showing relationship between emotional neglect (EN) and mania

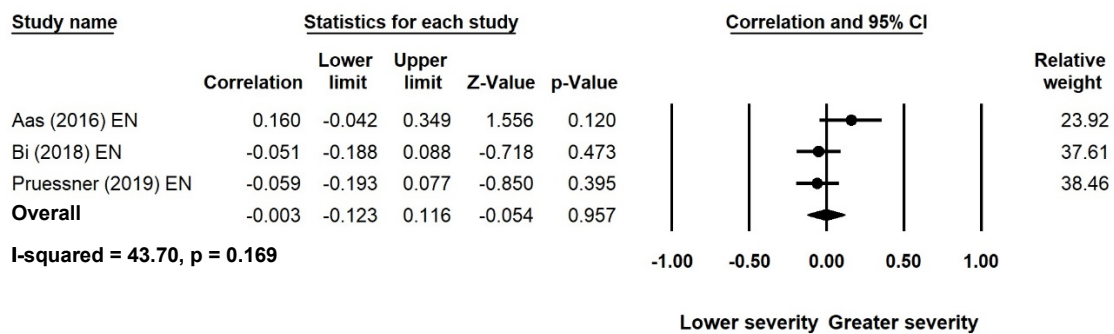

**Table S7.** Studies and their respective reasoning for the exclusion of quantitative analyses within symptom dimensions

| <b>First author of study</b> | <b>Dimensions excluded from</b>                                                                                         | <b>Reason for exclusion</b>                                                                                                                               |
|------------------------------|-------------------------------------------------------------------------------------------------------------------------|-----------------------------------------------------------------------------------------------------------------------------------------------------------|
| Alameda (2018)               | Positive, negative, depressive, mania (composite)                                                                       | Sample overlapping with Alameda et al., 2016 and Alameda et al., 2017                                                                                     |
| Alameda (2016)               | Depressive (composite)                                                                                                  | Sample overlapping with Alameda et al., 2017 and Alameda et al., 2018                                                                                     |
| Van Dam (2014)               | Positive (composite)                                                                                                    | Sample overlapping with Vam Dam et al., 2015                                                                                                              |
| Lysaker (2001)               | Positive, negative and disorganised (composite)                                                                         | Excluded from analyses for overall childhood adversity as their composite category measured abuse only                                                    |
| Lysaker (2005)               | Positive                                                                                                                | Authors were contacted for full data, but no response was given. Of the data extracted, it could not be transformed, for compatibility, into correlations |
| McCabe (2012)                | Negative (subscale only)                                                                                                | Authors were contacted for full data, but no response was given. Of the data extracted, it could not be transformed, for compatibility, into correlations |
| Ruby (2017)                  | Positive and negative                                                                                                   | Authors were contacted for full data, but no response was given. Of the data extracted, it could not be transformed, for compatibility, into correlations |
| Sahin (2013)                 | Positive and negative                                                                                                   | Authors were contacted for full data, but no response was given. Of the data extracted, it could not be transformed, for compatibility, into correlations |
| Sayin (2013)                 | Positive and depressive                                                                                                 | Authors were contacted for full data but no response was given. Of the data extracted, it could not be transformed, for compatibility, into correlations  |
| Schalinski (2015)            | Subscales only for each of the following dimensions; positive, negative, disorganised and manic. Composite for positive | Authors were contacted for full data, but no response was given. Of the data extracted, it could not be transformed, for compatibility, into              |



|                    |                       |                                                                                                                                     |
|--------------------|-----------------------|-------------------------------------------------------------------------------------------------------------------------------------|
|                    | and negative.         | correlations. Data on positive and negative with composite adversity data was available but overlapping with Schalinki et al., 2019 |
| Schalinski (2015b) | Positive and negative | Lack of compatible data as it measures exposure to trauma by year                                                                   |

### 1. Quality assessment procedures

The quality assessment was carried out using the Newcastle–Ottawa Scale (see Quality Assessment Tool<sup>51</sup> for cohort studies by two independent reviewers (YS and AC)

Those papers over which there was disagreement were discussed at a project group meeting. The Newcastle–Ottawa is a ten-point scale allocating points based on: the selection of cohorts (e.g. representativeness of the sample; 0–4 points), the comparability of cohorts (e.g. whether the study controls for confounding factors; 0–2 points), the identification of the exposure (e.g. objectivity of exposure measurement) and the outcomes of study participants (e.g. independence of outcome measurement, adequacy of follow-up; 0–3 points). Scores were considered as follows: “poor” quality for 3 or less; “fair” between 4 and 7 and “good” for scores of 8 or above. The agreed quality grades of each study are presented in Table S1 and the specific criteria used for our systematic review are specified in the Newcastle Ottawa Scale displayed below.

**Table S8.** Quality assessment results

| Author (Year)   | Selection                                   |                                        |                              |                                                                             | Comparability                                                      | Outcome                  |                                                    |                                     | Total |
|-----------------|---------------------------------------------|----------------------------------------|------------------------------|-----------------------------------------------------------------------------|--------------------------------------------------------------------|--------------------------|----------------------------------------------------|-------------------------------------|-------|
|                 | 1) Representativeness of the exposed cohort | 2) Selection of the non exposed cohort | 3) Ascertainment of exposure | 4) Demonstration that outcome of interest was not present at start of study | 1) Comparability of cohorts on the basis of the design or analysis | 1) Assessment of outcome | 2) Was follow-up long enough for outcomes to occur | 3) Adequacy of follow up of cohorts |       |
| Aas (2015)      |                                             | *                                      | *                            | *                                                                           |                                                                    | *                        |                                                    |                                     | 4     |
| Ajnakina (2016) | *                                           | *                                      | *                            | *                                                                           | *                                                                  | *                        |                                                    |                                     | 6     |
| Alameda (2016)  | *                                           | *                                      | *                            | *                                                                           | *                                                                  | *                        |                                                    | *                                   | 7     |
| Alameda (2017)  | *                                           | *                                      | *                            | *                                                                           |                                                                    | *                        |                                                    | *                                   | 6     |
| Alameda (2018)  | *                                           | *                                      | *                            | *                                                                           | *                                                                  | *                        |                                                    |                                     | 5     |

|                      |   |   |   |   |    |   |  |  |   |
|----------------------|---|---|---|---|----|---|--|--|---|
| Baudin (2011)        | * | * | * | * | ** | * |  |  | 7 |
| Bendall (2011)       | * | * | * | * |    | * |  |  | 5 |
| Bendall (2013)       |   | * | * | * |    | * |  |  | 4 |
| Bi (2018)            | * | * | * | * |    | * |  |  | 5 |
| Chae (2015)          |   | * | * | * | *  | * |  |  | 5 |
| Colip(2013)          | * | * | * | * | *  | * |  |  | 6 |
| Comacchio (2018)     | * | * | * | * |    | * |  |  | 5 |
| Derosse (2014)       | * | * | * | * |    | * |  |  | 5 |
| Duhig (2015)         | * | * | * | * |    | * |  |  | 5 |
| Gabinio (2018)       |   | * | * | * |    | * |  |  | 4 |
| Green (2014)         | * | * | * | * |    | * |  |  | 5 |
| Haahr (2018)         | * | * | * | * |    | * |  |  | 5 |
| Hardy (2016)         | * | * | * | * | *  | * |  |  | 6 |
| Heins (2011)         | * | * | * | * | *  | * |  |  | 6 |
| Kilcommons (2005)    |   | * | * | * |    | * |  |  | 4 |
| Kumari (2013)        |   | * | * | * |    | * |  |  | 4 |
| Lindgren (2017)      |   | * | * | * |    | * |  |  | 4 |
| Lysaker (2001)       |   | * | * | * |    | * |  |  | 4 |
| Lysaker (2005)       |   | * | * | * |    | * |  |  | 4 |
| McCabe (2012)        | * | * | * | * | *  | * |  |  | 6 |
| Mohammadzadeh (2019) |   | * | * | * |    | * |  |  | 4 |
| Offen (2002)         |   | * | * | * |    | * |  |  | 4 |
| Okubo (2017)         | * | * | * | * |    | * |  |  | 5 |
| Pruessner (2019)     | * | * | * | * | *  | * |  |  | 6 |
| Rajkumar (2015)      |   | * | * | * |    | * |  |  | 4 |
| Ramsay (2011)        |   | * | * | * |    | * |  |  | 4 |
| Ruby (2017)          |   | * | * | * | *  | * |  |  | 5 |

|                           |   |   |   |   |   |   |  |   |   |
|---------------------------|---|---|---|---|---|---|--|---|---|
| <b>Sar (2010)</b>         |   | * | * | * |   | * |  |   | 4 |
| <b>Sahin (2013)</b>       |   | * | * | * |   | * |  |   | 4 |
| <b>Sayin (2013)</b>       | * | * | * | * |   | * |  |   | 5 |
| <b>Schalinski (2015)</b>  |   | * | * | * | * | * |  | * | 6 |
| <b>Schalinski (2015B)</b> |   | * | * | * |   | * |  |   | 4 |
| <b>Schalinski (2019)</b>  | * | * | * | * | * | * |  |   | 6 |
| <b>Schenkel (2005)</b>    |   | * | * | * |   | * |  |   | 4 |
| <b>Seidenfaden (2017)</b> |   | * | * | * |   | * |  |   | 4 |
| <b>Simpson (2019)</b>     |   | * | * | * | * | * |  |   | 5 |
| <b>Stain (2013)</b>       | * | * | * | * |   | * |  |   | 5 |
| <b>Sun (2018)</b>         |   | * | * | * | * | * |  |   | 5 |
| <b>Ucok (2007)</b>        |   | * | * | * |   | * |  |   | 4 |
| <b>Van Dam (2014)</b>     | * | * | * | * | * | * |  |   | 6 |
| <b>Van Dam (2015)</b>     | * | * | * | * | * | * |  |   | 6 |
| <b>Weijers (2018)</b>     |   | * | * | * | * | * |  |   | 5 |

### **Newcastle-Ottawa Quality Assessment Scale for cohort studies**

*Note: A study can be awarded a maximum of one star for each numbered item within the Selection and Exposure categories. A maximum of two stars can be given for Comparability.*

#### **Selection**

Note: A study can be awarded a maximum of one star for each numbered item within the Selection and Exposure categories. A maximum of two stars can be given for Comparability.

##### 1) Representativeness of the exposed cohort

- a) truly representative of the average individuals with psychosis or attenuated psychotic symptoms in the community (100 participants and above) \*
- b) somewhat representative of the average individuals with psychosis or attenuated psychotic symptoms in the community (100 participants and above) \*
- c) selected group of users eg nurses, volunteers
- d) no description of the derivation of the cohort

##### 2) Selection of the non exposed cohort

- a) drawn from the same community as the exposed cohort \*
- b) drawn from a different source
- c) no description of the derivation of the non-exposed cohort

##### 3) Ascertainment of exposure

- a) secure record\*
- b) structured interview\*
- c) written self-report\* (star included here given the common use of self-reports in the field of adversity in psychosis)
- d) no description

##### 4) Demonstration that outcome of interest was not present at start of study

- a) yes \*
- b) no

#### **Comparability (count 2 stars)**

##### 1) Comparability of cohorts on the basis of the design or analysis

- a) study controls for confounders \*
- b) study controls for any additional factor (we considered a star here if studies used a robust statistical method (regression showing adjusted and unadjusted results for example)

#### **Outcome**

##### 1) Assessment of outcome

- a) independent blind assessment \*
- b) record linkage or formal interview of symptoms (such as; PANSS, BPRS, SANS, SAPS, etc)\*
- c) self-report
- d) no description

##### 2) Was follow-up long enough for outcomes to occur

- a) yes \*
- b) no

### 3) Adequacy of follow up of cohorts

- a) complete follow up - all subjects accounted for \*
- b) subjects lost to follow up unlikely to introduce bias - small number lost - > 20 % \*
- c) follow up rate < 80%) and no description of those lost
- d) no statement/ no follow up (cross sectional studies)

## 2. Results of heterogeneity assessment

In line with GRADE criteria, we explored the potential bias related to heterogeneity found in our analyses. We evaluated each of the forest plots when serious heterogeneity was found (I<sup>2</sup> statistic > 50% and Q test p value was <.05 according to others<sup>52</sup>). If the forest plot showed that some studies found more moderate effect sizes in one direction and other studies found larger effect sizes in the same direction, this heterogeneity might have relatively little importance, because both groups go in the same direction. Inversely, if the plots showed studies with large and small effects, respectively in opposite directions, this could indicate an important bias led by heterogeneity.

As can be seen in Table S7, among the 26 analyses conducted, 12 showed potential serious heterogeneity analyses on Sexual, physical and emotional abuse for mania; all the analyses for depression, emotional abuse and emotional neglect for positive and general adversity and emotional abuse for Negative.

### ***Mania (sexual and physical and emotional abuse analyses)***

Forest plot exploration for analyses for sexual and physical abuse revealed that one study with small effect size was in opposite direction as all the others, and after removal, heterogeneity disappeared (Bi et al.,<sup>12</sup> for sexual abuse, and Pruessner et al.<sup>32</sup>, for Physical abuse). For emotional abuse, only three studies were included in analyses which did not allow drawing conclusions about potential explanations of heterogeneity (one study led to medium effect sizes in the negative direction, one with medium effect size in the positive direction).

### ***Depression (general adversity and all abuse and neglect categories)***

For general adversity, sexual abuse, physical abuse and emotional abuse, exploration of the forest plots revealed that heterogeneity was due to studies with small and large effect sizes in the same direction, so this heterogeneity was not considered as potentially problematic. However, for physical neglect categories one study appeared to be the only one showing small effect sizes in the opposite direction as all the others (Pruessner et al., 2019<sup>32</sup>) and after removing it, the heterogeneity disappeared (for physical neglect I<sup>2</sup>: 30.819 and P-Value: 0.204 for emotional neglect I<sup>2</sup>: 20.245; P-value: 0.281) and results remained significant (for physical neglect, 6 studies; r = 0.222, 95% CI = [0.129, 0.312], P = .000; (for emotional neglect 6 studies; r = 0.242, 95% CI = [0.156, 0.325], P = .000); We concluded that that heterogeneity was due to the presence of that particular study for the neglect categories and that the heterogeneity for the remaining categories was not problematic as all studies were pointing to the same direction.

### ***Positive (emotional abuse and emotional neglect)***

For emotional abuse analyses heterogeneity was led by one study (Green et al., 2014<sup>19</sup>), which was the only one showing small effect sizes in the opposite direction than all the other 10 studies. Its removal decreased the heterogeneity to a very low level (I<sup>2</sup>: 50.953; P-value: 0.031) where all the studies were pointing at the same direction.

For emotional neglect, there were a few papers showing medium effect sizes in one direction and in the opposite direction, thus heterogeneity could not be attributed to any particular study.

### ***Negative***

Emotional abuse was the only analysis showing potential serious heterogeneity. The dispersion of this dimension was significant with different studies going in different directions. For example De Rosse et al.,<sup>16</sup> and Mohammed et al., 2019<sup>29</sup> showed great positive effect sizes (corr coeff: 0.310; and 0.501 respectively, against studies such as Uco showing effects in opposite direction Corr coeff: -0.60 or Sayin et al., -0.229. No specific outlier could be identified as causing this serious heterogeneity.

### ***Disorganization***

Analyses in this dimension did not show serious heterogeneity.

## **3. Results of meta-regression analyses**

We conducted meta-regressions when a minimum of 6 studies were conducted by type of adversity. We explored the following factors in our meta-regressions: (I) proportion of female participants; (II) mean age; (III) (whether or not they used CTQ and PANSS as instruments versus using other instruments, which allow to estimate potential bias related to studies that used other instruments – such as measuring adversity with CECA or symptoms with BPRS); (IV) assessment scores based on the NOS; (V) years of education. Among the 12 studies that showed serious heterogeneity (Table 1) 9 included at least 6 studies and thus meta-regressions were conducted, results are detailed below (see Table S2).

### ***Proportion of females***

This factor was significant for most of the analyses conducted for depression (general adversity as detailed in table S3, but not in the other analyses for the remaining dimensions.

### ***Mean age***

This factor was not significant in any of the analyses.

### ***Use of CTQ/PANSS or CTQ or PANSS***

This factor was significant for analyses on emotional abuse in the depressive domain. It did not appear to influence results on the other dimensions

### ***Newcastle Ottawa Scale Scores (NOS)***

This covariate appeared significant in analyses of sexual and physical abuse and neglect subtypes for the depressive domain.

**Years of education**

This covariate was underreported in studies included in this review (only appeared in 11 studies, see Table S5) only allowing conducting meta-regression for the general adversity analyses in the negative dimension (as all the other analyses had less than 6 studies with data available). It appeared that better education tended to be associated with lower scores of negative symptoms (coeff: -0.08; p-value 0.060).

**Table S9.** Meta-regressions between general adversity and symptom dimensions and moderating factors

| Outcome                                              | Moderators                     | No. of Studies | R Coefficient | SE   | 95% CI         | Z-Value | P value      |
|------------------------------------------------------|--------------------------------|----------------|---------------|------|----------------|---------|--------------|
| <b>Manic dimension</b><br>(General adversity)        | Female %                       | 11             | -0.24         | 0.23 | (-0.69; 0.20)  | -1.06   | 0.288        |
|                                                      | Mean age                       | 11             | 0.00          | 0.00 | (-0.01; 0.01)  | 0.50    | 0.613        |
|                                                      | Using CTQ vs not using CTQ     | 11             | 0.00          | 0.07 | (-0.15; 0.14)  | -0.11   | 0.908        |
|                                                      | Using PANSS vs not using PANSS | 11             | -0.04         | 0.07 | (-0.19; 0.10)  | -0.63   | 0.531        |
|                                                      | NOS                            | 11             | 0.00          | 0.03 | (-0.06; 0.07)  | 0.18    | 0.856        |
| <b>Disorganised dimension</b><br>(General adversity) | Female %                       | 7              | -0.36         | 0.34 | (-1.04; 0.31)  | -1.05   | 0.294        |
|                                                      | Mean age                       | 7              | 0.00          | 0.00 | (-0.01; 0.02)  | 0.48    | 0.629        |
|                                                      | NOS                            | 7              | 0.02          | 0.02 | (-0.02; 0.08)  | 0.95    | 0.343        |
| <b>Depressive dimension</b><br>(General adversity)   | Female %                       | 13             | 1.02          | 0.48 | 0.06; 1.98     | 2.09    | <b>0.036</b> |
|                                                      | Mean age                       | 13             | 0.01          | 0.00 | 0.00; 0.02     | 1.91    | 0.056        |
|                                                      | Using CTQ vs not using CTQ     | 13             | 0.10          | 0.11 | (-0.11; 0.32)  | 0.94    | 0.354        |
|                                                      | Using PANSS vs not using PANSS | 13             | -0.11         | 0.12 | (-0.35; 0.12)  | -0.90   | 0.366        |
|                                                      | NOS                            | 13             | -0.07         | 0.06 | -0.19; 0.05    | -1.12   | 0.260        |
| <b>Depressive dimension</b><br>(Sexual abuse)        | Female %                       | 12             | 1.03          | 0.36 | (0.31; 1.75)   | 2.8     | <b>0.005</b> |
|                                                      | Mean age                       | 12             | 0.00          | 0.00 | (-0.00; 0.01)  | 0.57    | 0.571        |
|                                                      | Using CTQ vs not using CTQ     | 12             | 0.08          | 0.09 | (-0.10; 0.26)  | 0.86    | 0.389        |
|                                                      | NOS                            | 12             | -0.14         | 0.03 | (-0.21; -0.07) | -3.91   | <b>0.000</b> |
| <b>Depressive dimension</b><br>(Physical abuse)      | Female %                       | 9              | 0.99          | 0.42 | (0.16; 1.81)   | 2.35    | <b>0.019</b> |
|                                                      | Mean age                       | 9              | -0.00         | 0.00 | (-0.02; 0.00)  | -0.86   | 0.388        |
|                                                      | Using CTQ vs not using CTQ     | 9              | 0.17          | 0.10 | (-0.03; 0.38)  | 1.61    | 0.108        |
|                                                      | NOS                            | 9              | -0.13         | 0.04 | (-0.22; -0.04) | -2.19   | <b>0.004</b> |
| <b>Depressive dimension</b><br>(Emotional abuse)     | Female %                       | 8              | 0.83          | 0.51 | (-0.17; 1.83)  | 1.62    | 0.105        |
|                                                      | Mean age                       | 8              | -0.00         | 0.00 | (-0.02; 0.01)  | -0.47   | 0.637        |



|                                                    |                                 |    |       |       |                |       |              |
|----------------------------------------------------|---------------------------------|----|-------|-------|----------------|-------|--------------|
|                                                    | NOS                             | 8  | -0.10 | 0.06  | (-0.23; 0.02)  | -1.56 | 0.118        |
| <b>Depressive dimension</b><br>(Physical neglect)  | Female %                        | 7  | 1.35  | 0.63  | (0.10; 2.60)   | 2.13  | <b>0.033</b> |
|                                                    | Mean age                        | 7  | 0.00  | 0.01  | (-0.01; 0.02)  | 0.61  | 0.54         |
|                                                    | Using CTQ/PANSS vs using others | 7  | 0.10  | 0.25  | (-0.38; 0.59)  | 0.42  | 0.674        |
|                                                    | NOS                             | 7  | -0.21 | 0.06  | (-0.34; -0.08) | -3.36 | <b>0.001</b> |
| <b>Depressive dimension</b><br>(Emotional neglect) | Female %                        | 7  | 1.31  | 0.44  | (0.44; 2.19)   | 2.96  | <b>0.003</b> |
|                                                    | Mean age                        | 7  | 0.00  | 0.00  | (-0.00; 0.02)  | 1.00  | 0.316        |
|                                                    | Using CTQ/PANSS vs using others | 7  | 0.14  | 0.20  | (-0.25; 0.53)  | 0.69  | 0.488        |
|                                                    | NOS                             | 7  | -0.19 | 0.04  | (-0.29; -0.10) | -4.21 | <b>0.000</b> |
| <b>Positive dimension</b><br>(General adversity)   | Female %                        | 27 | -0.11 | 0.15  | (-0.42; 0.18)  | -0.76 | 0.449        |
|                                                    | Mean age                        | 27 | 0.00  | 0.00  | (-0.00; 0.00)  | 0.83  | 0.406        |
|                                                    | Using CTQ/PANSS vs using others | 27 | -0.00 | 0.04  | (-0.08; 0.08)  | -0.05 | 0.936        |
|                                                    | NOS                             | 27 | 0.00  | 0.02  | (-0.04; 0.04)  | -0.10 | 0.920        |
| <b>Positive dimension</b><br>(Sexual abuse)        | Female %                        | 17 | -0.24 | 0.18  | (-0.60; 0.11)  | -1.31 | 0.19         |
|                                                    | Mean age                        | 17 | 0.00  | 0.00  | (-0.00; 0.01)  | 1.68  | 0.092        |
|                                                    | Using CTQ/PANSS vs using others | 17 | -0.07 | 0.06  | (-0.19; 0.04)  | -1.2  | 0.23         |
|                                                    | NOS                             | 17 | 0.00  | 0.03  | (-0.07; 0.06)  | -0.07 | 0.945        |
| <b>Positive dimension</b><br>(Physical abuse)      | Female %                        | 13 | -0.10 | 0.23  | (-0.55; 0.34)  | -0.47 | 0.637        |
|                                                    | Mean age                        | 13 | 0.00  | 0.005 | (-0.00; 0.01)  | 0.17  | 0.867        |
|                                                    | Using CTQ/PANSS vs using others | 13 | -0.00 | 0.063 | (-0.13; 0.11)  | -0.13 | 0.897        |
|                                                    | NOS                             | 13 | -0.04 | 0.04  | (-0.13; 0.04)  | 0.97  | 0.33         |
| <b>Positive dimension</b><br>(Emotional abuse)     | Female %                        | 11 | -0.09 | 0.36  | (-0.80; 0.61)  | -0.25 | 0.8          |
|                                                    | Mean age                        | 11 | -0.00 | 0.00  | (-0.01; 0.01)  | -0.29 | 0.768        |

|                                                  |                                 |    |       |      |               |       |       |
|--------------------------------------------------|---------------------------------|----|-------|------|---------------|-------|-------|
|                                                  | Using CTQ/PANSS vs using others | 11 | -0.01 | 0.10 | (-0.21; 0.18) | -0.18 | 0.856 |
|                                                  | NOS                             | 11 | -0.09 | 0.07 | (-0.23; 0.04) | -1.35 | 0.178 |
| <b>Positive dimension</b><br>(Physical neglect)  | Female %                        | 10 | 0.06  | 0.29 | (-0.52; 0.64) | 0.21  | 0.835 |
|                                                  | Mean age                        | 10 | 0.00  | 0.00 | (-0.00; 0.01) | 1.01  | 0.311 |
|                                                  | Using CTQ/PANSS vs using others | 10 | 0.00  | 0.09 | (-0.17; 0.18) | 0.05  | 0.963 |
|                                                  | NOS                             | 10 | -0.09 | 0.05 | (-0.19; 0.00) | -1.89 | 0.058 |
| <b>Positive dimension</b><br>(Emotional neglect) | Female %                        | 12 | -0.08 | 0.32 | (-0.72; 0.56) | -0.25 | 0.799 |
|                                                  | Mean age                        | 12 | -0.00 | 0.00 | (-0.01; 0.00) | -1.22 | 0.222 |
|                                                  | Using CTQ/PANSS vs using others | 12 | 0.04  | 0.09 | (-0.13; 0.22) | 0.51  | 0.609 |
|                                                  | NOS                             | 12 | -0.08 | 0.06 | (-0.21; 0.04) | -1.29 | 0.199 |
| <b>Negative dimension</b><br>(General adversity) | Female %                        | 25 | 0.20  | 0.14 | (-0.07; 0.49) | 1.42  | 0.155 |
|                                                  | Mean age                        | 25 | 0.00  | 0.00 | (-0.00; 0.01) | 0.78  | 0.438 |
|                                                  | Using CTQ/PANSS vs using others | 25 | 0.02  | 0.04 | (-0.06; 0.10) | 0.52  | 0.605 |
|                                                  | NOS                             | 25 | -0.02 | 0.02 | (-0.06; 0.01) | -1.30 | 0.195 |
|                                                  | Education, years                | 6  | -0.08 | 0.04 | (-0.17-0.00)  | -1.88 | 0.060 |
| <b>Negative dimension</b><br>(Sexual abuse)      | Female %                        | 16 | 0.00  | 0.15 | (-0.30; 0.31) | 0.03  | 0.973 |
|                                                  | Mean age                        | 16 | 0.00  | 0.00 | (-0.00; 0.01) | 1.89  | 0.059 |
|                                                  | Using CTQ/PANSS vs using others | 16 | 0.04  | 0.04 | (-0.04; 0.13) | 0.98  | 0.325 |
|                                                  | NOS                             | 16 | -0.01 | 0.03 | (-0.04; 0.07) | -0.49 | 0.624 |
| <b>Negative dimension</b><br>(Physical abuse)    | Female %                        | 14 | 0.06  | 0.22 | (-0.37; 0.49) | 0.27  | 0.787 |
|                                                  | Mean age                        | 14 | -0.00 | 0.00 | (-0.01; 0.00) | -0.59 | 0.554 |
|                                                  | Using CTQ/PANSS vs using others | 14 | 0.03  | 0.06 | (-0.09; 0.15) | 0.5   | 0.615 |
|                                                  | NOS                             | 14 | 0.02  | 0.04 | (-0.06; 0.11) | 0.51  | 0.61  |
| <b>Negative dimension</b><br>(Emotional abuse)   | Female %                        | 12 | 0.35  | 0.48 | (-0.59; 1.29) | 0.73  | 0.467 |
|                                                  | Mean age                        | 12 | 0.00  | 0.00 | (-0.01; 0.01) | 0.6   | 0.546 |
|                                                  | Using CTQ/PANSS vs using others | 12 | 0.14  | 0.12 | (-0.10; 0.39) | 1.13  | 0.261 |
|                                                  | NOS                             | 12 | -0.04 | 0.10 | (-0.25; 0.16) | -0.42 | 0.671 |
| <b>Negative dimension</b>                        | Female %                        | 10 | 0.11  | 0.18 | (-0.24; 0.46) | 0.6   | 0.545 |
|                                                  | Mean age                        | 10 | 0.00  | 0.00 | (-0.00; 0.00) | 0.21  | 0.832 |

|                                        |                                 |    |       |      |               |       |       |
|----------------------------------------|---------------------------------|----|-------|------|---------------|-------|-------|
| (Physical neglect)                     | Using CTQ/PANSS vs using others | 10 | 0.00  | 0.06 | (-0.11; 0.12) | 0.05  | 0.96  |
|                                        | NOS                             | 10 | 0.01  | 0.04 | (-0.07; 0.10) | 0.3   | 0.763 |
| Negative dimension (Emotional neglect) | Female %                        | 11 | -0.15 | 0.16 | (-0.47; 0.17) | -0.9  | 0.369 |
|                                        | Mean age                        | 11 | 0.00  | 0.00 | (-0.00; 0.00) | 0.16  | 0.873 |
|                                        | Using CTQ/PANSS vs using others | 11 | -0.04 | 0.05 | (-0.13; 0.05) | -0.83 | 0.407 |
|                                        | NOS                             | 11 | -0.01 | 0.04 | (-0.10; 0.08) | -0.21 | 0.837 |

In the disorganized dimension meta regressions accounting for instruments used could not be conducted because of lack of sufficient studies.

#### 4. Sensitivity analysis

We conducted sensitivity analyses, when at least 8 studies were present per analysis and there were at least 3 studies per group. We stratified studies based on whether they used CTQ/PANSS or not, considering that variation in instruments may have led to important heterogeneity. For example, if there were 8 studies examined but only 2 examined CTQ against 6 for PANSS comparison were not conducted as there could be a strong bias led by sample size

##### **Mania**

Given the low number of studies in analyses by subtype of adversities (see **Table S2**) only analyses by general adversity could be part of sensitivity analyses. As only two of the 12 studies in this section used CTQ and PANSS for this analyses (Baudin et al., 2011 and Bi et al., 2018), we conducted comparisons between groups based on whether studies used PANSS or not, which led to group of 5 and 7 respectively (see table S4 below) allowing comparisons. We did the same based on the use of CTQ. As can be seen in the table below, these comparisons did not reveal differences between groups with similar levels of effect irrespectively of the use or not of CTQ and PANSS.

##### **Disorganization**

Given the low number of studies for subtypes of adversity analyses (see **Table S2**) only analyses by general adversity could be part of sensitivity analyses. Only two studies used CTQ and PANSS (Aas et al., 2015<sup>4</sup> and Baudin et al., 2011<sup>9</sup>), and although 4 studies did use PANSS (Alameda et al., 2018<sup>8</sup>; Baudin et al., 2011<sup>9</sup>; Schalinki et al., 2015<sup>39</sup>, Seidenfaden et al., 2017<sup>43</sup> and Stain et al., 2013<sup>45</sup>), only two did not use PANSS (Aas et al., 2015<sup>4</sup> and Schenkel et al., 2005<sup>42</sup>) thus not allowing to conducted informative analyses. Only two studies used CTQ (Aas et al., 2015<sup>4</sup> and Baudin et al., 2011<sup>9</sup>) so no comparison according to this variable was possible.

##### **Depression**

In this section, there was considerable heterogeneity in the use of scales for depression (PANNS, BPRS, MADRS, BDI, CDSS, PHQ-9, BSI-II), thus it was not possible to run sensitivity analyses based on our initial criteria CTQ/PANSS (only one study used CTQ and PANSS (Aas et al., 2015<sup>4</sup>)). Thus, we categorized studies according to whether or not they used PANSS and CTQ separately, and this allowed us to conduct sensitivity analyses for the general adversity and sexual abuse analysis, but not for the other subtypes.

### ***Positive and Negative***

Analyses by whether studies used CTQ and PANSS or not could be conducted for the general adversity analysis and the 5 subtypes in each dimension. As can be seen in Table x none of the sensitivity analyses found differences between studies that used CTQ and PANSS and those that did not.

### ***Additional sensitivity analyses***

6 of the studies that used a composite score of general adversity also included (in addition to our chosen experiences of interest) experiences that could signify a proxy of such type of traumas or equivalent experiences but that did not correspond exactly with the clear-cut definitions of our adversities of interest, or occasionally that were outside our scope. These are: “witnessing trauma” (killing or serious injury) (Kilcommons et al., et al.,<sup>23</sup>), having a criminal parent and foster care placement (Kumari et al.,<sup>24</sup>); various interpersonal life events within the context of family (Lingren et al.,<sup>25</sup>), emotional and depressive instability within the parents (McCabe et al.,<sup>28</sup>), potential substance use and fighting (Seidenfaden et al.,<sup>43</sup>) and a composite measure also include some non-interpersonal traumas (Stain et al.,<sup>45</sup>). We still decided to include these studies given that in their measure of general adversity there was a clear predominance of our adversities of interest. To further rule out the possibility that this artifact may have influenced our results, we have run some additional sensitivity analyses for the general measure in the 5 dimensions, examining whether our results changed after excluding these 6 papers.

Results show that: for the positive dimension, the general adversity passed from  $r = 0.16$  (0.12 - 0.20),  $p < .001$  to  $r = 0.17$  (0.13 - 0.21),  $p < .001$ ; in the negative from  $r = 0.10$  (0.06 - 0.14),  $p < .001$  to  $r = 0.11$  (0.06 - 0.16),  $p < .001$ ; in the depressive from  $r = 0.24$  (0.16 - 0.32),  $p < .001$  to  $r = 0.26$  (0.17 - 0.35),  $p < .001$ ; in the manic from  $r = 0.07$  (0.01 - 0.14),  $p = .020$  to  $r = 0.08$  (0.026 - 0.14),  $p = .005$  and in the disorganized from  $r = 0.09$  (0.03 - 0.15),  $p = .003$  to  $r = 0.13$  (0.05 - 0.20),  $p < .001$ .

We can thus conclude that removing those studies did not change the direction and magnitude of the associations found, thus not affecting the interpretation of our findings.

**Table S10.** Sensitivity analyses examining impact of measures used on relationships observed

|                                     | Studies | Sample size | Subtypes of adversities, only the general samples | Values (corr coeff) | 95% CI        | P            | Between group Heterogeneity (Q value; df; P-value) |
|-------------------------------------|---------|-------------|---------------------------------------------------|---------------------|---------------|--------------|----------------------------------------------------|
| <b>General Adversity MANIA</b>      | 11      |             | 11                                                | 0.08                | (0.01; 0.15)  | <b>0.020</b> |                                                    |
| No PANSS                            | 5       |             | 5                                                 | 0.11                | (0.00; 0.21)  | <b>0.047</b> | 0.36;<br>1;<br>0.545                               |
| Yes PANSS                           | 6       |             | 6                                                 | 0.06                | (-0.02; 0.16) | 0.173        |                                                    |
| No CTQ                              | 7       |             | 7                                                 | 0.09                | (-0.01; 0.20) | 0.095        | 0.03;<br>1;<br>0.858                               |
| Yes CTQ                             | 4       |             | 4                                                 | 0.07                | (-0.02; 0.17) | 0.119        |                                                    |
| <b>General Adversity DEPRESSION</b> | 13      |             | 13                                                | 0.24                | (0.15; 0.34)  | <b>0.000</b> |                                                    |
| No CTQ                              | 6       |             | 6                                                 | 0.19                | (0.01; 0.35)  | <b>0.033</b> | 0.84;<br>1;<br>0.359                               |
| Yes CTQ                             | 7       |             | 7                                                 | 0.29                | (0.16; 0.40)  | <b>0.000</b> |                                                    |
| No PANSS                            | 10      |             | 10                                                | 0.27                | (0.15; 0.38)  | <b>0.000</b> | 1.06;<br>1;<br>0.302                               |
| Yes PANSS                           | 3       |             | 3                                                 | 0.16                | (0.01; 0.33)  | 0.067        |                                                    |
| <b>Sexual abuse DEPRESSION</b>      | 15      |             | 14                                                | 0.24                | (0.16; 0.32)  | <b>0.000</b> |                                                    |
| No CTQ                              | 5       |             | 5                                                 | 0.17                | (0.01; 0.32)  | <b>0.035</b> | 0.61;<br>1;<br>0.434                               |
| Yes CTQ                             | 7       |             | 7                                                 | 0.24                | (0.14; 0.33)  | <b>0.000</b> |                                                    |

|                                       |    |  |    |      |               |              |             |
|---------------------------------------|----|--|----|------|---------------|--------------|-------------|
| <b>General adversity<br/>POSITIVE</b> | 27 |  | 27 | 0.16 | (0.12; 0.20)  | <b>0.000</b> |             |
| No CTQ/PANSS                          | 17 |  | 17 | 0.16 | (0.10; 0.21)  | <b>0.000</b> | 0.00;       |
| Yes CTQ/PANSS                         | 10 |  | 10 | 0.16 | (0.09; 0.22)  | <b>0.000</b> | 1<br>0.970  |
| <b>Sexual abuse<br/>POSITIVE</b>      | 14 |  | 14 | 0.14 | (0.08; 0.19)  | 0.000        |             |
| No CTQ/PANSS                          | 11 |  | 11 | 0.15 | (0.10; 0.21)  | <b>0.000</b> | 0.85;       |
| Yes CTQ/PANSS                         | 6  |  | 6  | 0.09 | (-0.02; 0.21) | <b>0.122</b> | 1;<br>0.356 |
| <b>Physical abuse<br/>POSITIVE</b>    | 13 |  | 13 | 0.15 | (0.09; 0.21)  | <b>0.000</b> |             |
| No CTQ/PANSS                          | 7  |  | 7  | 0.14 | (0.09; 0.19)  | <b>0.000</b> | 0.02;       |
| Yes CTQ/PANSS                         | 6  |  | 6  | 0.15 | (0.02; 0.28)  | <b>0.024</b> | 1;<br>0.882 |
| <b>Emotional abuse<br/>POSITIVE</b>   | 11 |  | 11 | 0.16 | (0.07; 0.24)  | <b>0.000</b> |             |
| No CTQ/PANSS                          | 5  |  | 5  | 0.18 | (0.01; 0.33)  | <b>0.032</b> | 0.07;       |
| Yes CTQ/PANSS                         | 6  |  | 6  | 0.15 | (0.05; 0.25)  | <b>0.004</b> | 1;<br>0.786 |
| <b>Physical neglect<br/>POSITIVE</b>  | 9  |  | 9  | 0.06 | (-0.01; 0.13) | 0.111        |             |
| No CTQ/PANSS                          | 4  |  | 4  | 0.07 | (-0.10; 0.24) | <b>0.440</b> | 0.01;       |
| Yes CTQ/PANSS                         | 6  |  | 6  | 0.05 | (-0.02; 0.14) | <b>0.162</b> | 1;<br>0.909 |

|                                       |    |  |    |       |                    |              |             |
|---------------------------------------|----|--|----|-------|--------------------|--------------|-------------|
| <b>Emotional neglect<br/>POSITIVE</b> | 12 |  | 12 | 0.09  | (0.01; 0.18)       | <b>0.027</b> |             |
| No CTQ/PANSS                          | 6  |  | 6  | 0.07  | (-0.03; 0.19)      | 0.257        | 0.29;       |
| Yes CTQ/PANSS                         | 6  |  | 6  | 0.12  | (-0.00; 0.25)      | 0.065        | 1;<br>0.588 |
| <b>General adversity<br/>NEGATIVE</b> | 25 |  | 25 | 0.09  | (0.05; 0.13)       | <b>0.000</b> |             |
| No CTQ/PANSS                          | 14 |  | 14 | 0.80  | (0.03; 0.12)       | <b>0.000</b> | 0.45;       |
| Yes CTQ/PANSS                         | 11 |  | 11 | 0.10  | (0.03; 0.18)       | <b>0.003</b> | 1;<br>0.499 |
| <b>Sexual abuse<br/>NEGATIVE</b>      | 13 |  | 13 | 0.03  | (-0.02- 0.08)      | 0.277        |             |
| No CTQ/PANSS                          | 9  |  | 9  | 0.02  | (-0.02;<br>0.083)  | 0.290        | 0.33;       |
| Yes CTQ/PANSS                         | 7  |  | 7  | 0.05  | (-0.02 –<br>0.144) | 0.182        | 1;<br>0.566 |
| <b>Physical abuse<br/>NEGATIVE</b>    | 12 |  | 12 | 0.05  | (0.06; 0.102)      | <b>0.028</b> |             |
| No CTQ/PANSS                          | 6  |  | 12 | -0.03 | (-0.212;<br>0.144) | 0.703        | 1.29;       |
| Yes CTQ/PANSS                         | 6  |  | 12 | 0.11  | (-0.01; 0.22)      | 0.074        | 1;<br>0.256 |
| <b>Emotional abuse<br/>NEGATIVE</b>   | 12 |  | 12 | 0.03  | (-0.08;<br>0.156)  | 0.568        |             |
| No CTQ/PANSS                          | 6  |  | 6  | -0.03 | (-0.21; 0.14)      | 0.703        | 1.29;       |
| Yes CTQ/PANSS                         | 6  |  | 6  | 0.10  | (-0.06 –<br>0.27)  | 0.210        | 1;<br>0.256 |

|                                       |    |  |    |      |              |              |                      |
|---------------------------------------|----|--|----|------|--------------|--------------|----------------------|
| <b>Physical neglect<br/>NEGATIVE</b>  | 9  |  | 9  | 0.14 | (0.07; 0.20) | <b>0.000</b> |                      |
| No CTQ/PANSS                          | 4  |  | 4  | 0.12 | (0.04; 0.21) | <b>0.004</b> | 0.00;<br>1;<br>0.959 |
| Yes CTQ/PANSS                         | 6  |  | 6  | 0.13 | (0.05; 0.20) | <b>0.001</b> |                      |
| <b>Emotional neglect<br/>NEGATIVE</b> | 11 |  | 11 | 0.13 | (0.08; 0.18) | <b>0.000</b> |                      |
| No CTQ/PANSS                          | 5  |  | 5  | 0.14 | (0.09; 0.20) | <b>0.000</b> | 0.68;<br>1;<br>0.407 |
| Yes CTQ/PANSS                         | 6  |  | 6  | 0.10 | (0.03; 0.18) | <b>0.007</b> |                      |

Analyses by subtype for the depressive dimension could not be stratified according to using PANSS or not as less than 3 studies for analyses did use PANSS, so they could only be stratified according to the use of CTQ or not. Only the general adversity category could be stratified according to the use of PANSS or not.



## References

1. Van Os J, Linscott RJ, Myin-Germeys I, Delespaul P, Krabbendam L. A systematic review and meta-analysis of the psychosis continuum: evidence for a psychosis proneness–persistence–impairment model of psychotic disorder. *Psychological medicine* 2009;39(2):179-195.
2. Varese F, Smeets F, Drukker M, et al. Childhood adversities increase the risk of psychosis: a meta-analysis of patient-control, prospective- and cross-sectional cohort studies. *Schizophr Bull* Jun 2012;38(4):661-671.
3. Alameda L, Rodriguez V, Carr E, et al. A systematic review on mediators between adversity and psychosis: potential targets for treatment. *Psychological Medicine* 2020;50(12):1966-1976.
4. Aas M, Andreassen O, Melle I. Childhood trauma is associated with slower improvement of symptoms: Findings from the one-year follow-up of patients with first-episode psychosis. 2015.
5. Ajnakina O, Trotta A, Oakley-Hannibal E, et al. Impact of childhood adversities on specific symptom dimensions in first-episode psychosis. *Psychological Medicine* 2016.
6. Alameda L, Golay P, Baumann PS, Ferrari C, Do KQ, Conus P. Age at the time of exposure to trauma modulates the psychopathological profile in patients with early psychosis. *J Clin Psychiatry* May 2016;77(5):e612-618.
7. Alameda L, Golay P, Baumann PS, et al. Mild Depressive Symptoms Mediate the Impact of Childhood Trauma on Long-Term Functional Outcome in Early Psychosis Patients. *Schizophr Bull* Sep 1 2017;43(5):1027-1035.
8. Alameda L, Fournier M, Khadimallah I, et al. Redox dysregulation as a link between childhood trauma and psychopathological and neurocognitive profile in patients with early psychosis. *Proceedings of the National Academy of Sciences* 2018;115(49):12495-12500.
9. Baudin G, Godin O, Lajnef M, et al. Differential effects of childhood trauma and cannabis use disorders in patients suffering from schizophrenia. *Schizophrenia Research* 2016.
10. Bendall S, Jackson HJ, Hulbert CA. What self-generated speech is externally misattributed in psychosis? Testing three cognitive models in a first-episode sample. *Schizophrenia research* 2011;129(1):36-41.
11. Bendall S, Hulbert CA, Alvarez-Jimenez M, Allott K, McGorry PD, Jackson HJ. Testing a model of the relationship between childhood sexual abuse and psychosis in a first-episode psychosis group: the role of hallucinations and delusions, posttraumatic intrusions, and selective attention. *The Journal of nervous and mental disease* 2013;201(11):941-947.
12. Bi XJ, Lv XM, Ai XY, et al. Childhood trauma interacted with BDNF Val66Met influence schizophrenic symptoms. 2018.
13. Chae S, Sim M, Lim M, Na J, Kim D. Multivariate analysis of relationship between childhood trauma and psychotic symptoms in patients with schizophrenia. 2015.
14. Collip D, Myin-Germeys I, Wichers M, et al. FKBP5 as a possible moderator of the psychosis-inducing effects of childhood trauma. 2013.
15. Comacchio C, Howard LM, Bonetto C, et al. The impact of gender and childhood abuse on age of psychosis onset, psychopathology and needs for care in psychosis patients. 2019.

16. DeRosse P, Nitzburg GC, Kompancaril B, Malhotra AK. The relation between childhood maltreatment and psychosis in patients with schizophrenia and non-psychiatric controls. *Schizophr Res* May 2014;155(1-3):66-71.
17. Duhig M, Patterson S, Connell M, et al. The prevalence and correlates of childhood trauma in patients with early psychosis. *Australian & New Zealand Journal of Psychiatry* 2015;49(7):651-659.
18. Gabinio T, Ricci T, Kahn JP, Malaspina D, Moreira H, Veras AB. Early trauma, attachment experiences and comorbidities in schizophrenia. *Trends in psychiatry and psychotherapy* 2018;40(3):179-184.
19. Green MJ, Chia T, Cairns MJ, Wu J, Tooney PA, Scott RJ, Carr VJ. Catechol-O-methyltransferase (COMT) genotype moderates the effects of childhood trauma on cognition and symptoms in schizophrenia. *Journal of Psychiatric Research* 2014.
20. Haahr UH, Larsen TK, Simonsen E, et al. Relation between premorbid adjustment, duration of untreated psychosis and close interpersonal trauma in first-episode psychosis. *Early Interv Psychiatry* Jun 2018;12(3):316-323.
21. Hardy A, Emsley R, Freeman D, Bebbington P, Garety PA, Kuipers EE, Dunn G, Fowler D. Psychological Mechanisms Mediating Effects between Trauma and Psychotic Symptoms: The Role of Affect Regulation, Intrusive Trauma Memory, Beliefs, and Depression. 2016.
22. Heins M, Simons C, Lataster T, et al. Childhood trauma and psychosis: a case-control and case-sibling comparison across different levels of genetic liability, psychopathology, and type of trauma. *American Journal of Psychiatry* 2011;168(12):1286-1294.
23. Kilcommons A, Morrison A. Relationships between trauma and psychosis: an exploration of cognitive and dissociative factors. *Acta Psychiatrica Scandinavica* 2005;112(5):351-359.
24. Kumari V, Gudjonsson G, Raghuvanshi S, et al. Reduced thalamic volume in men with antisocial personality disorder or schizophrenia and a history of serious violence and childhood abuse. *European Psychiatry* 2013.
25. Lindgren M, Mantyla T, Rikandi E, Torniainen-Holm M, Morales-Munoz I, Kieseppa T, Mantere O, Suvisaari J. Childhood adversities and clinical symptomatology in first-episode psychosis. *Psychiatry Research* 2017.
26. Lysaker PH, Meyer P, Evans JD, Marks KA. Neurocognitive and symptom correlates of self-reported childhood sexual abuse in schizophrenia spectrum disorders. *Ann Clin Psychiatry* Jun 2001;13(2):89-92.
27. Lysaker PH, Beattie NL, Strasburger AM, Davis LW. Reported history of child sexual abuse in schizophrenia: Associations with heightened symptom levels and poorer participation over four months in vocational rehabilitation. *Journal of Nervous and Mental Disease* 2005.
28. McCabe KL, Maloney EA, Stain HJ, Loughland CM, Carr VJ. Relationship between childhood adversity and clinical and cognitive features in schizophrenia. *Journal of Psychiatric Research* 2012.
29. Mohammadzadeh A, Azadi S, King S, Khosravani V, Sharifi Bastan F. Childhood trauma and the likelihood of increased suicidal risk in schizophrenia. 2019.
30. Offen L, Waller G, Thomas G. Is reported childhood sexual abuse associated with the psychopathological characteristics of patients who experience auditory hallucinations? *Child Abuse & Neglect* 2003.
31. Okubo R, Inoue T, Hashimoto N, et al. The mediator effect of personality traits on the relationship between childhood abuse and depressive symptoms in schizophrenia. 2017.

32. Pruessner M, King S, Vracotas N, Abadi S, Iyer S, Malla AK, Shah J, Joober R. Gender differences in childhood trauma in first episode psychosis: Association with symptom severity over two years. 2019.
33. Rajkumar RP. The Impact of Childhood Adversity on the Clinical Features of Schizophrenia. 2015.
34. Ramsay CE, Flanagan P, Gantt S, Broussard B, Compton MT. Clinical correlates of maltreatment and traumatic experiences in childhood and adolescence among predominantly African American, socially disadvantaged, hospitalized, first-episode psychosis patients. *Psychiatry Research* 2011.
35. Ruby E, Rothman K, Corcoran C, Goetz RR, Malaspina D. Influence of early trauma on features of schizophrenia. *Early Intervention in Psychiatry* 2017.
36. Sahin S, Yuksel C, Guler J, Karadayi G, Akturan E, Gode E, Ozhan AA, Ucok A. The history of childhood trauma among individuals with ultra high risk for psychosis is as common as among patients with first-episode schizophrenia. *Early Interv Psychiatry* Nov 2013;7(4):414-420.
37. Sar V, Taycan O, Bolat N, Ozmen M, Duran A, Ozturk E, Ertem-Vehid H. Childhood trauma and dissociation in schizophrenia. *Psychopathology* 2010.
38. Sayin A, Yuksel N, Konac E, Yilmaz A, Dogan B, Tonge S, Sahiner S, Menevse A. Effects of the adverse life events and disrupted in schizophrenia-1 (DISC1) gene polymorphisms on acute symptoms of schizophrenia. 2013.
39. Schalinski I, Fischer Y, Rockstroh B. Impact of childhood adversities on the short-term course of illness in psychotic spectrum disorders. *Psychiatry Research* 2015.
40. Schalinski I, Teicher MH. Type and timing of childhood maltreatment and severity of shutdown dissociation in patients with schizophrenia spectrum disorder. *PLoS One* 2015;10(5):e0127151.
41. Schalinski I, Breinlinger S, Hirt V, Teicher MH, Odenwald M, Rockstroh B. Environmental adversities and psychotic symptoms: The impact of timing of trauma, abuse, and neglect. *Schizophrenia research* 2019;205:4-9.
42. Schenkel LS, Spaulding WD, DiLillo D, Silverstein SM. Histories of childhood maltreatment in schizophrenia: Relationships with premorbid functioning, symptomatology, and cognitive deficits. *Schizophrenia Research* 2005.
43. Seidenfaden D, Knorr U, Soendergaard MG, Poulsen HE, Fink-Jensen A, Jorgensen MB, Jorgensen A. The relationship between self-reported childhood adversities, adulthood psychopathology and psychological stress markers in patients with schizophrenia. *Comprehensive Psychiatry* 2017.
44. Simpson S, Phillips L, Baksheev G, et al. Stability of retrospective self-reports of childhood trauma in first-episode psychosis. *Early Interv Psychiatry* Aug 2019;13(4):908-913.
45. Stain HJ, Bronnick K, Hegelstad WTV, Joa I, Johannessen JO, Langeveld J, Mawn L, Larsen TK. Impact of interpersonal trauma on the social functioning of adults with first-episode psychosis. 2014.
46. Sun P, Alvarez-Jimenez M, Simpson K, Lawrence K, Peach N, Bendall S. Does dissociation mediate the relationship between childhood trauma and hallucinations, delusions in first episode psychosis? *Comprehensive Psychiatry* 2018.
47. Ucok A, Bikmaz S. The effects of childhood trauma in patients with first-episode schizophrenia. *Acta Psychiatrica Scandinavica* 2007.
48. van Dam D, Korver-Nieberg N, Velthorst E, Meijer C, de Haan L. Childhood maltreatment, adult attachment and psychotic symptomatology: A study in patients, siblings and controls. *Social Psychiatry and Psychiatric Epidemiology: The*

*International Journal for Research in Social and Genetic Epidemiology and Mental Health Services* 2014.

49. van Dam D, van Nierop M, Viechtbauer W, et al. Childhood abuse and neglect in relation to the presence and persistence of psychotic and depressive symptomatology. *Psychological Medicine* 2015.
50. Weijers J, Fonagy P, Eurelings-Bontekoe E, Termorshuizen F, Viechtbauer W, Selten J. Mentalizing impairment as a mediator between reported childhood abuse and outcome in nonaffective psychotic disorder. *Psychiatry Research* 2018.
51. Stang A. Critical evaluation of the Newcastle-Ottawa scale for the assessment of the quality of nonrandomized studies in meta-analyses. *European journal of epidemiology* 2010;25(9):603-605.
52. Davies C, Segre G, Estradé A, et al. Prenatal and perinatal risk and protective factors for psychosis: a systematic review and meta-analysis. *The Lancet Psychiatry* 2020.
